1 **The dynamic equilibrium of nascent and parental MCMs safeguards replicating**  
2 **genomes**

3  
4 Hana Sedlackova<sup>1</sup>, Maj-Britt Rask<sup>1</sup>, Rajat Gupta<sup>2</sup>, Chunaram Choudhary<sup>2</sup>, Kumar Somyajit<sup>1\*</sup>, Jiri  
5 Lukas<sup>1\*</sup>

6  
7 <sup>1</sup>Protein Signaling Program, Novo Nordisk Foundation Center for Protein Research, Faculty of  
8 Health and Medical Sciences, University of Copenhagen, Blegdamsvej 3b, DK-2200 Copenhagen,  
9 Denmark.

10 <sup>2</sup>Proteomics Program, Novo Nordisk Foundation Center for Protein Research, Faculty of Health and  
11 Medical Sciences, University of Copenhagen, Blegdamsvej 3b, DK-2200 Copenhagen, Denmark.

12  
13  
14 \*Correspondence: K.S. (kr.somyajit@cpr.ku.dk), J.L. (jiri.lukas@cpr.ku.dk)

15

16

17

18

19

20

21

22

23

24

25 **The MCM2-7 (minichromosome maintenance) protein complex is a DNA unwinding motor**  
26 **required for the eukaryotic genome duplication<sup>1</sup>. Although a huge excess of MCM2-7 is**  
27 **loaded onto chromatin in G1 phase to form pre-replication complexes (pre-RCs), only 5-10**  
28 **percent are converted into a productive CDC45-MCM-GINS (CMG) helicase in S phase – a**  
29 **perplexing phenomenon often referred to as the ‘MCM paradox’<sup>2</sup>. Remaining pre-RCs stay**  
30 **dormant but can be activated under replication stress (RS)<sup>3</sup>. Remarkably, even a mild**  
31 **reduction in MCM pool results in genome instability<sup>4,5</sup>, underscoring the critical requirement**  
32 **for high-level MCM maintenance to safeguard genome integrity across generations of**  
33 **dividing cells. How this is achieved remains unknown. Here, we show that for daughter cells**  
34 **to sustain error-free DNA replication, their mothers build up a stable nuclear pool of MCMs**  
35 **both by recycling of chromatin-bound MCMs (referred to as parental pool) and synthesizing**  
36 **new MCMs (referred to as nascent pool). We find that MCMBP, a distant MCM paralog<sup>6</sup>,**  
37 **ensures the influx of nascent MCMs to the declining recycled pool, and thereby sustains**  
38 **critical levels of MCMs. MCMBP promotes nuclear translocation of nascent MCM3-7 (but**  
39 **not MCM2), which averts accelerated MCM proteolysis in the cytoplasm, and thereby fosters**  
40 **assembly of licensing-competent nascent MCM2-7 units. Consequently, lack of MCMBP leads**  
41 **to reduction of nascent MCM3-7 subunits in mother cells, which translates to poor MCM**  
42 **inheritance and grossly reduced pre-RCs formation in daughter cells. Unexpectedly, whereas**  
43 **the pre-RC paucity caused by MCMBP deficiency does not alter the overall bulk DNA**  
44 **synthesis, it escalates the speed and asymmetry of individual replisomes. This in turn**  
45 **increases endogenous replication stress and renders cells hypersensitive to replication**  
46 **perturbations. Thus, we propose that surplus of MCMs is required to safeguard replicating**  
47 **genomes by modulating physiological dynamics of fork progression through chromatin**  
48 **marked by licensed but inactive MCM2-7 complexes.**

49 Eukaryotic cells possess an efficient mechanism to restrict MCM assembly as pre-RCs only once  
50 per cell cycle<sup>7</sup>. In G1-phase, nearly an entire pool of MCM2-7 units are loaded onto the chromatin  
51 as pre-RCs ([Extended Data Fig. 1a](#)). A fraction of licensed pre-RCs is converted to CMGs and  
52 gives rise to active replisomes, which are critical for the complete and stable duplication of the  
53 genome<sup>3</sup>. Throughout S-phase, pre-RCs progressively dissociate from DNA<sup>8</sup>, either due to passive  
54 replication of unused, dormant origins or during fork termination when two active CMG units meet  
55 each other<sup>9</sup>. Since chromatin-detached MCMs are prone to degradation<sup>10</sup> and the pre-RC formation  
56 starts already in late-mitosis<sup>11</sup>, we hypothesized the existence of a mechanism, which safeguards  
57 sufficient MCM levels in mother cells such that their daughters become fully competent for pre-RC  
58 licensing right from the start of their life cycles.

59

60 To test this hypothesis, we generated a HaloTag-MCM4 fusion construct and expressed it from the  
61 endogenous locus in human U2OS cells ([Extended Data Fig. 1b](#)). This enabled us to monitor MCM  
62 dynamics and stability in a defined genetic system and without adverse effects of protein  
63 overexpression. Using quantitative image-based cytometry (QIBC)<sup>12</sup> of large cell populations, we  
64 first confirmed that a short pulse of fluorescent HaloTag ligand rapidly labeled the bulk of nuclear  
65 MCM4 including the fraction involved in licensed pre-RCs ([Extended Data Fig. 1c, d](#)). We then set  
66 out to investigate whether the MCM steady state levels are maintained by a dynamic fluctuation of  
67 the protein supply, shielding the old available pool, or combination of both. To mark the instantly  
68 available pool, we pulse-labeled MCM4 with fluorescent HaloTag ligand (JF549) for 20 minutes  
69 followed by releasing cells in a fresh media with a nonfluorescent HaloTag blocker to halt MCM  
70 labeling ([Fig. 1a, left; i](#)). Alternatively, to follow contribution of newly synthesized MCM4, we  
71 cultured the cells with continuous presence of the fluorescent HaloTag ligand for two rounds of cell  
72 division (48 hours) ([Fig. 1a, left; ii](#)). Strikingly, the nuclear levels of Halo-MCM4 gradually

73 declined when chased with the blocker but remained stable during continuous labeling (Fig. 1a,  
74 right; Extended Data Fig. 1e). This was recapitulated by an immunoblot analysis of a fluorescent  
75 signal from HaloTag ligand (Fig. 1b). The total levels of MCM4 remained constant in either  
76 condition when analyzed by MCM4-specific antibody (Fig. 1b), indicating that the rapidly-  
77 declining pool of pulse-labeled MCM4 must have been replenished by a newly synthesized protein.  
78  
79 To test this prediction, we set out to directly visualize and quantify in real time the different pools  
80 of MCMs. We designed a dual-labeling protocol of MCM4 with two fluorescently labeled HaloTag  
81 ligands (JF549 and JF646, respectively) temporally separated with the HaloTag blocker in a U2OS  
82 cell line stably expressing green fluorescent protein (GFP)-tagged PCNA, a robust indicator of cell  
83 cycle progression<sup>13</sup> (Fig. 1c). With this experimental setup, we could extend our previous findings  
84 by showing that MCM4 pulse-labeled with the JF549 ligand (which marks the pre-existing pool)  
85 steadily declined throughout the cell cycle (Fig. 1c, d). Furthermore, a chase with the JF646 ligand  
86 revealed a vivid production of new MCM4, starting from the S-phase entry and continuing until  
87 late-S/G2 (Fig. 1c, d). Intriguingly, at the end of the cell cycle, combination of the pre-existing and  
88 the newly synthesized protein doubled the total pool of MCM, ensuring that the newly-born  
89 daughter cells instantly receive the same total amount of MCMs, with which their mother started  
90 the previous cell cycle (Fig. 1d). Immunoblotting and QIBC-based analysis of Halo-MCM4  
91 confirmed at large cell population levels a gradual loss of JF549 and progressive increase in JF646  
92 pools before cell cycle completion (Extended Data Fig. 2a, b). Reassuringly, inhibiting protein  
93 synthesis by cycloheximide (CHX) or blocking the proteasome by MG132 confirmed that the stable  
94 nuclear pool of MCM is a result of progressive synthesis of JF646-MCM4, compensating for a  
95 gradual decay in JF549-MCM4 (Extended Data Fig. 2c, d). Reflecting these distinct features of the  
96 MCM pools, we name the JF549-labeled pool as ‘parental MCMs’, which have been at least once



97 on chromatin and are recycled from the one cell cycle to the next. Following the same logic, we  
98 name the JF646-labeled pool as ‘nascent MCMs’, which were synthesized *de novo* by mother cells  
99 during S phase and were passed on to their daughters without previous engagement in pre-RCs.  
100 Together, our data suggest that despite their gradual decline, a fraction of parental MCMs is  
101 recycled for the next cell cycle. In parallel, the loss of the parental MCM pool is counterbalanced by  
102 native MCM synthesized throughout S phase of the maternal cell cycle.

103

104 To investigate the function of parental and nascent MCM pools inherited by daughter cells, we  
105 analyzed their respective contribution to chromatin-bound pre-RCs. QIBC analysis of chromatin-  
106 bound proteins revealed that the nascent and parental MCM4 were licensed in ~2:1 ratio (Fig. 1e,  
107 [Extended Data Fig. 3a, b](#)), each via a canonical CDC6-dependent mechanism (Fig. 1f). Strikingly,  
108 although originating from different pools, both nascent and parental MCMs efficiently interacted  
109 with CDC45, suggesting an equal proficiency in forming an active CMG helicase in next cell cycle  
110 ([Extended Data Fig. 3b](#)). Very similar results were obtained with endogenous HaloTag-MCM2  
111 subunit, indicating that efficient origin licensing in daughter cells critically relies on parental and  
112 nascent MCMs from the previous cell cycle ([Extended Data Fig. 3d, e, f](#)). These findings are  
113 aligned with a previous report in *S. cerevisiae* suggesting that the *de novo* generation of nascent  
114 Cdc6 and Mcm proteins during G1-phase drives each cycle of pre-RC formation<sup>14</sup>. Strikingly,  
115 however, unlike in budding yeast, we find that the human nascent MCMs are generated in the  
116 preceding S-phase in a fully licensing-competent mode, while being kept away from chromatin (and  
117 thus inducing re-replication) by degradation of MCM loader CDT1. Supporting this notion,  
118 treatment of cells with MLN4924, which stabilizes CDT1 by inhibiting cullin-RING E3 ubiquitin  
119 ligases<sup>15</sup>, resulted in re-licensing of both the parental and nascent MCMs in the same cell cycle  
120 ([Extended Data Fig. 4a-c](#)). Based on these data, we conclude that mother cells constantly replenish

121 the gradual loss of parental MCMs by synthesizing nascent MCM subunits and thus ensure that  
122 daughter cells inherit sufficient amount of MCMs to sustain replication of their genomes.

123 Consistent with this notion, QIBC analysis of endogenously tagged GFP-MCM2 and GFP-MCM4  
124 confirmed a continuous increase in the total intensity of GFP signal (which unlike the mean  
125 intensity is independent of nuclear size/volume) as cells progress from G1 to G2 phase ([Extended  
126 Data Fig. 4d](#)).

127

128 Chromatin-bound MCMs are remarkably stable but much less is known about their turnover before  
129 they engage into licensed pre-RCs. Although MCM proteins do not require extensive folding by  
130 canonical chaperones such as HSP70/HSP90 (mainly attributed to their intrinsically globular  
131 secondary structure)<sup>16</sup>, they might need co-chaperones to rapidly reach their subcellular localization  
132 and assemble into stable MCM2-7 complexes. Intriguingly, MCM4 was shown to associate with a  
133 co-chaperone FKBP51 in a complex with MCMBP<sup>16</sup>, a hitherto poorly characterized ultrahigh  
134 affinity MCM interactor<sup>6,17</sup>. We thus asked whether molecular chaperoning activity might assist to  
135 sustain the production of nascent MCMs complexes as well as parental MCM complex released  
136 from chromatin in a given S phase. We focused on MCMBP, which is distantly related to MCMs  
137 and exhibits structure-function properties that are well suited to regulate MCMs throughout their  
138 life cycle<sup>17</sup>. We first generated U2OS cells ectopically expressing FLAG-MCMBP and analyzed the  
139 MCMBP interactome from the whole-cell extract by SILAC-based mass spectrometry (MS)  
140 ([Extended Data Fig. 5a](#)). Consistent with previous reports<sup>6,17,18</sup>, we found MCM subunits as top  
141 interactors of MCMBP, but we also noticed that MCMBP does not associate with the components  
142 of active CMG such as CDC45 or GINS4 ([Extended Data Fig. 5a](#)). We validated the MS data by  
143 reciprocal coimmunoprecipitation and immunoblot analysis ([Extended Data Fig. 5b](#)). Extended  
144 interaction analysis under more stringent ionic treatment of biochemically fractionated cell lysates

145 (Extended Data Fig. 5c) revealed that MCMBP interacts with all the subunits of MCMs except  
146 MCM2 as described previously<sup>6</sup>, and is also refrained of active CMG components (Fig. 2a, b;  
147 Extended Data Fig. 5d). Furthermore, we noticed that the interaction between MCM and MCMBP  
148 was much more prominent in soluble fractions compared to chromatin-bound proteins (Fig. 2a, b),  
149 indicating that MCMBP might regulate a specific MCM pool that is distinct from pre-RCs or active  
150 CMG. To test this hypothesis, we used the CRISPR–Cas9 technology to generate a derivative of  
151 Halo-MCM4 U2OS cell line with endogenously-tagged GFP-MCMBP susceptible to an inducible  
152 auxin-based degradation (Extended Data Fig. 5e). This allowed us to analyze in an isogenic cellular  
153 system the fate of nascent and parental MCM4 after a rapid and quantitative MCMBP depletion  
154 (Fig. 2c, d). Strikingly, single-cell tracking revealed that while the dynamics of parental Halo-  
155 MCM4 remained unaltered, nascent Halo-MCM4 showed a massive delay in nuclear accumulation  
156 after MCMBP degradation (Fig. 2d, e). These observations were validated by QIBC (Extended Data  
157 Fig. 6a) and recapitulated in MCMBP knockout (MCMBP-KO) U2OS cell line (Extended Data Fig.  
158 6b, c).

159  
160 Intriguingly, during the real-time tracking of MCMBP-deficient cells, we noticed that the paucity of  
161 nascent Halo-MCM4 in cell nuclei was accompanied by its accumulation in the cytoplasm (Fig.  
162 2d), suggesting a possible role of MCMBP in nucleo-cytoplasmic trafficking of MCM proteins.  
163 Indeed, QIBC analysis of cells expressing Halo-labeled MCMs confirmed that the cytoplasmic  
164 mislocalization of MCM4 in MCMBP-KO cells was restricted to the nascent, but not parental  
165 MCM pool (Fig. 2f). Intriguingly, detailed analysis with antibodies specific to individual MCM  
166 subunits revealed that the lack of MCMBP severely compromised nuclear import of all MCMs  
167 except MCM2 (Fig. 2g, h; Extended Data Fig. 7a). Furthermore, siRNA-mediated depletion of  
168 MCMBP, but not CDC45 and GINS1, also recapitulated the cytoplasmic mislocalization of MCMs

169 both in MCMBP-KO and MCMBP-degron cells (Fig. 2g), reinforcing a specific role of MCMBP in  
170 the nuclear trafficking of nascent MCMs.

171

172 From all MCM subunits, only MCM2 and MCM3 are known to possess an autonomous nuclear  
173 localization signal (NLS)<sup>19</sup>, leading to the assumption that MCM3-7 and MCM2 are transported  
174 across the nuclear membrane as two different units, similar to what was also reported for ORC sub-  
175 complexes<sup>20</sup> or by a possible formation of multiple sub-complexes as observed upon  
176 overexpression of MCM2<sup>19</sup>. Moreover, a careful analysis of MCM3-7 nuclear translocation in  
177 MCMBP-negative cells suggests that while these MCM subunits were grossly mis-localized to the  
178 cytoplasm, a fraction of them eventually entered cell nuclei, albeit with slower kinetics (Fig. 2d).  
179 This led us to postulate that the MCM3-embedded NLS might not be sufficient to confer stable  
180 nuclear localization of the MCM3-7 subcomplex and that MCMBP might be required to boost  
181 nuclear import and retention. Indeed, bioinformatic analysis revealed a putative bipartite NLS motif  
182 in the N-terminus of MCMBP (Fig. 3a), whose deletion severely abrogated the nuclear import of  
183 MCMBP (Fig. 3a; Extended Data Fig. 7b) but also other MCM subunits (Fig. 3b; Extended Data  
184 Fig. 7c, d). Importantly, MCM2 nuclear localization remained independent of MCMBP nuclear  
185 transport (Fig. 3b). In support of this notion, MCMBP does not associate with MCM2 with high  
186 affinity when compared to the other MCM subunits<sup>6</sup> (Fig. 2a). Together, these results establish that  
187 MCMBP translocates nascent MCM3-7 to the cell nuclei independent of the MCM2 subunit. Our  
188 findings are also in agreement with the observation that fission yeast Mcb1 (an ortholog of human  
189 MCMBP) plays a critical role in maintaining the nuclear localization of MCMs<sup>17</sup>. However, in  
190 contrast to the reported mechanism of Mcb1 in prohibiting aberrant nuclear export of MCM  
191 subunits<sup>17</sup>, our results elucidate the direct involvement of MCMBP in the nuclear trafficking of  
192 newly synthesized MCM3-7 subunits.

193 Next, we wanted to understand the fate of mislocalized cytoplasmic MCMs. Immunoblot analysis  
194 of MCM subunits in MCMBP-KO cells showed a marked reduction in total MCM pool, but not  
195 other replication-associated factors such as CDC45, GINS, TIMELESS, and PCNA ([Extended Data](#)  
196 [Fig. 6b](#)). The low levels of cytoplasmic MCM3-7 proteins were not associated with reduced  
197 transcripts ([Extended Data Fig. 7e](#)), indicating accelerated proteolysis. In support of this notion,  
198 treatment of MCMBP-deficient cells with the proteasome inhibitor MG132 stabilized the  
199 cytoplasmic pool of nascent MCM4 ([Extended Data Fig. 7f](#)). Strikingly, although localized in  
200 cytoplasm, the pool of MCMs remained stable in cells expressing the NLS-deficient MCMBP  
201 mutant as opposed to MCMBP-KO cells ([Fig. 3c](#)), indicating that a physical interaction of MCMBP  
202 with MCM3-7 is sufficient to shield the latter against proteolysis regardless of subcellular location.  
203 To our surprise, while MCM2 is transported to cell nuclei independently of MCMBP, its stability  
204 was compromised in the NLS-deficient MCMBP mutant ([Fig. 3c](#)), which is aligned with the  
205 alleviated nuclear as well as total protein levels of MCM2 in MCMBP-KO cells ([Extended Data](#)  
206 [Fig. 6b, 7d](#)). This indicates that under the conditions of reduced nascent MCM3-7 subunits, the  
207 unused MCM2 is also degraded, albeit with a slower kinetics ([Extended Data Fig. 7g](#)).  
208  
209 To further explore the relationship between distinct MCMs pools and their involvement in pre-RC  
210 formation, we set out to systematically analyze nascent and parental MCMs directly upon their  
211 inheritance by wild type and MCMBP-deficient daughter cells, respectively. To this end, we  
212 compared the total inherited nuclear pool of parental and nascent MCMs to their chromatin-bound  
213 fractions at the G1-S boundary, when the pre-RC licensing reaches its maximum levels. QIBC  
214 analysis of the total nuclear MCMs in daughter cells revealed a two-fold higher accumulation of  
215 nascent MCM2 as compared to parental MCM2, both in normal and MCMBP-deficient cells ([Fig.](#)  
216 [3d, e; Extended Data Fig. 8a, b](#)). A very similar trend was observed also for MCM4 (used here as a

217 proxy for MCM3-7 subcomplex) but only in MCMBP-proficient settings (Fig. 3d; Extended Data  
218 Fig. 9a, b). In sharp contrast, MCMBP-KO cells were unable to maintain this 2:1 ratio and instead  
219 featured almost equal levels of nascent and parental MCM4 subunits, creating a relative excess of  
220 nascent MCM2 over the other MCM subunits (Fig. 3e, Extended Data Fig. 9a, b). Strikingly, QIBC  
221 analysis of chromatin-bound fractions in MCMBP-KO daughter cells also revealed that the excess  
222 nascent MCM2 was not translated to increased origin licensing, suggesting that the superfluous  
223 nascent MCM2 was refrained from new pre-RC formation due to shortage of complementary pool  
224 of nascent MCM3-7 (Fig. 3g, Extended Data Fig. 8c, 9c). Notably, this result also indicated that  
225 nascent and parental MCMs might not mix in the same MCM2-7 units. This notion is based on a  
226 prediction that if nascent and parental MCMs readily mix, then the overabundant nascent MCM2 in  
227 MCMBP-KO cells would be expected to compete for its place both in nascent and parental MCM2-  
228 7 holocomplexes. However, QIBC analysis suggests the opposite by revealing a failure of nascent  
229 MCM2 to load on chromatin in MCMBP-deficient settings (Fig. 3g; compare rectangular boxes in  
230 Fig. 3e and 3g). Instead, as our previous data already indicated, the surplus level MCM2 excluded  
231 from chromatin under these conditions was gradually degraded (Fig. 2j, Extended Data Fig. 6b).  
232 Consequently, while in normal daughter cells, pre-RC licensing is composed of two copies of  
233 nascent and one copy of parental MCM2-7 rings, MCMBP negative daughter cells license only one  
234 copy of each, nascent and parental MCM2-7, resulting into sparsely organized pre-RCs (Fig. 3h).  
235 From these observations, MCMBP emerges as a multi-functional chaperone that confers stability to  
236 nascent MCM3-7 subunits and fosters their relocation to cell nuclei, and thereby supports the  
237 formation of licensing-competent MCM2-7 and thus contribute to reach the critical levels of pre-  
238 RCs.  
239

240 Finally, to test the significance of nascent MCM production and maintenance in mother cells for  
241 genome integrity of the ensuing cell generations, we monitored total chromatin-bound MCMs as a  
242 readout for the efficiency of pre-RC formation. We consistently observed a dramatic loss of  
243 licensed pre-RCs in the absence of MCMBP (Fig. 4a). Surprisingly, in spite of the low level of  
244 chromatin-bound MCMs, the bulk DNA synthesis and chromatin association of active replisome  
245 components (e.g. TIMELESS and PCNA) remained very similar (Fig. 4b, c). To reconcile these  
246 opposing effects of MCMBP loss on pre-RCs and active replisomes, we monitored inter origin  
247 distance (IOD) to quantitatively assess origin density. Consistent with the reduced pre-RCs, we  
248 observed an increase in IOD in exponentially growing MCMBP-KO cells (Fig. 4d). Strikingly,  
249 when CLASPIN was depleted to boost the frequency of origin firing<sup>21</sup>, the enforced decrease in  
250 IOD was still evident in MCMBP-KO cells (Fig. 4d), suggesting that with such a low level of pre-  
251 RCs, MCMBP deficient cells still maintained a pool of dormant replication origins, although with a  
252 compromised density of initiation events. In line with these findings, we observed an increased  
253 frequency of 53BP1-nuclear bodies (Fig. 4e), an established hallmark of inheritable under-  
254 replicated DNA lesions arising at genomic loci lacking high density of replication origins<sup>22,23</sup>.

255

256 Next, to understand whether the reduced pre-RCs directly impact DNA replication at the individual  
257 fork level, we measured fork speed using the DNA fiber technique<sup>24</sup>. Strikingly, we found that the  
258 absence of MCMBP (and the corresponding reduction of pre-RC licensing) mildly increased the  
259 overall rate of replication fork progression (Fig. 4f). Acceleration of replication forks under the  
260 reduced levels of chromatin-bound MCMs was further supported by partial depletion of the MCM  
261 loader CDT1 (Extended Data Fig. 10a), suggesting that abundance of origin licensing is tightly  
262 associated with the physiological progression of the replisome. Based on these results, we  
263 postulated that a surplus of chromatin-loaded inactive MCM2-7 complexes could provide physical



264 resistance to the moving forks, absence of which might unleash uncontrolled fork progression and  
265 increase the frequency of pausing or stalling events. Of note, although median fork speed showed a  
266 shift towards faster forks, we consistently observed a prominent population of slow-moving forks in  
267 MCMBP-KO cells (Fig. 4f). Consistent with the idea that abnormal fork progression can impose  
268 stress on replicating genomes<sup>25</sup>, we found increased levels of individual fork asymmetry, both at the  
269 slow and the fast end of the fork speed spectrum in MCMBP-KO cells (Fig. 4f). Importantly, both  
270 fork acceleration and asymmetry in MCMBP-KO cells could be rescued by reintroducing wildtype,  
271 but not NLS-deficient MCMBP mutant (Extended Data Fig. 10b, c), suggesting that the paucity of  
272 chromatin-loaded MCMs directly impacts the physiological movement of individual forks and  
273 cause replication-associated stress. To further test this prediction, we monitored sister fork  
274 asymmetry, a direct readout for the replication stress arising due to uneven processivity on either  
275 side of the replication bubble<sup>25</sup>. Supporting this idea, MCMBP-KO cells showed increased  
276 incidence of asymmetry in bidirectional forks (Fig. 4g), suggesting frequent pausing of individual  
277 replisomes. To understand which pool of fork speed was responsible for causing asymmetrical  
278 extension of replication bubble in MCMBP deficient cells, we evaluated speed of sister forks  
279 (derived from the tract lengths on either side of bidirectional forks). Strikingly, while comparison of  
280 shorter sister tracts showed substantial slowing of replication forks in MCMBP specific manner,  
281 long sister tracts between normal and MCMBP-KO cells exhibited remarkably similar fork rates  
282 (Fig. 4h). This imbalance in speed of long and short tracts skewed the overall symmetry of  
283 bidirectional replication in MCMBP deficient cells (Fig. 4g). However, to our surprise, a complete  
284 absence of accelerated sister forks in MCMBP deficient cells (Fig. 4h; as opposed to unidirectional  
285 replication forks in Fig. 4f) directly implied that the unrestrained speed of replication forks led to  
286 their frequent pausing/stalling and turning them into shorter sister tracts, and also explains the  
287 incidence of slow forks observed in Fig. 4f (population I). Furthermore, stress at the individual fork



288 level was accompanied by elevated levels of global chromatin-bound RPA, activation of ATR  
289 signaling, increased micronuclei formation, and massive sensitization to topoisomerase I inhibitor  
290 CPT, which are often associated with hallmarks of replication stress<sup>26</sup> ([Extended Data Fig. 10d-h](#)).  
291 Together, these data suggest that MCMBP is required to sustain MCM levels at the threshold  
292 required for to maintain optimal origin density and physiological fork speed.  
293  
294 Collectively, this study uncovers how cells generate and maintain surplus of MCM subunits across  
295 ensuing generations to alleviate endogenous DNA replication stress. The salient new addition to the  
296 current understanding is our finding that MCM pool is sustained by continuous recycling of already  
297 licensed parental MCMs, and a simultaneous synthesis of the nascent pool already in mother cells,  
298 thereby ensuring that daughter cells receive sufficient amount of licensing-competent MCM units as  
299 soon as they enter the new cell cycle ([Extended Data Fig. 10i](#)). Perhaps most strikingly, while we  
300 find that both parental and nascent MCMs retain equal proficiency for pre-RC formation and  
301 subsequent activation as functional CMG helicases, our results also indicate that nascent and  
302 parental MCM subunits do not readily mix to form ‘chimeric’ MCM complexes. The functional  
303 consequences of this are not clear at this point but these findings open up a new avenue to study  
304 whether parental MCMs involved as pre-RCs in the previous cell cycle are inherited by daughter  
305 cells with specific post-translational modifications that pre-determine their biochemical activity.  
306 Conceptually, these findings are broadly analogous to old and new H3-H4 dimers that remain in  
307 distinct pools upon nucleosome disruption and reassembly during DNA replication<sup>27</sup>.  
308 Mechanistically, we uncovered a specific requirement of MCMBP in safeguarding the contribution  
309 of nascent MCM3-7 subunit to overall MCM pool in mother cells before they divide. Without  
310 MCMBP, daughter cells inherit only half of the nascent MCM2-7 units, which results into  
311 drastically impaired licensing of replication origins ([Fig. 4i](#), [Extended Data Fig. 10i](#)). Interestingly,

312 recent studies showed that cells released from quiescence enter the first S-phase with severely  
313 underlicensed chromatin and are thus particularly vulnerable to replication stress<sup>28,29</sup>. Based on our  
314 findings, we suggest that this is partly caused the fact that every time a cell commits to proliferate,  
315 it needs to pass the first S phase to build sufficient amount of nascent MCMs and thus sustain the  
316 ensuing cell cycles with minimum endogenous replication stress. Strikingly, MCMBP mediated  
317 maintenance and licensing of excess MCMs is largely dispensable for exponential DNA synthesis  
318 as well as preservation of dormant ‘back-up’ origins. In this regard, our findings allowed us to  
319 revisit a long-standing enigma called the “MCM paradox”<sup>30</sup> by postulating that beyond its role in  
320 supplying backup replication origins under stressed conditions, the high surplus of MCMs is vital to  
321 enforce physiological pace of replication fork progression (Fig. 4i, Extended Data Fig. 10i). Thus,  
322 we propose an unanticipated role of inactive chromatin-loaded MCM2-7 as an inbuilt genome  
323 surveillance mechanism to set the physiological threshold of fork speed and limit replication-  
324 associated stress (Fig. 4i). From this perspective, we define ‘fork-speed management’ as one on the  
325 main functions of 10-20 fold excess DNA-bound MCMs, a concept that can illuminate the notion  
326 that even a mild alteration in MCM2 or MCM4 levels are associated with the increased incidence of  
327 spontaneous tumor formation<sup>31,32</sup>. Alterations in physiological fork progression and accumulation of  
328 spontaneous replication-associated stress might explain the extreme tumor susceptibility  
329 of hypomorphic variants of MCMs<sup>31,32</sup>. Furthermore, based on our discovery of the critical role of  
330 MCMBP in nascent MCM maintenance, we propose that pharmacological inhibition of MCMBP  
331 may sensitize cancer cells by increasing their endogenous burden of replication stress due to  
332 pathologically accelerated forks, and decreased density of potential ‘back-up’ replication origins.  
333  
334  
335

336 **References:**

- 337 1 Deegan, T. D. & Diffley, J. F. MCM: one ring to rule them all. *Curr Opin Struct Biol* **37**,  
338 145-151, doi:10.1016/j.sbi.2016.01.014 (2016).
- 339 2 Ibarra, A., Schwob, E. & Mendez, J. Excess MCM proteins protect human cells from  
340 replicative stress by licensing backup origins of replication. *Proc Natl Acad Sci U S A* **105**,  
341 8956-8961, doi:10.1073/pnas.0803978105 (2008).
- 342 3 Alver, R. C., Chadha, G. S. & Blow, J. J. The contribution of dormant origins to genome  
343 stability: from cell biology to human genetics. *DNA Repair (Amst)* **19**, 182-189,  
344 doi:10.1016/j.dnarep.2014.03.012 (2014).
- 345 4 Liang, D. T., Hodson, J. A. & Forsburg, S. L. Reduced dosage of a single fission yeast  
346 MCM protein causes genetic instability and S phase delay. *J Cell Sci* **112 ( Pt 4)**, 559-567  
347 (1999).
- 348 5 Orr, S. J. *et al.* Reducing MCM levels in human primary T cells during the G(0)-->G(1)  
349 transition causes genomic instability during the first cell cycle. *Oncogene* **29**, 3803-3814,  
350 doi:10.1038/onc.2010.138 (2010).
- 351 6 Sakwe, A. M., Nguyen, T., Athanasopoulos, V., Shire, K. & Frappier, L. Identification and  
352 characterization of a novel component of the human minichromosome maintenance  
353 complex. *Mol Cell Biol* **27**, 3044-3055, doi:10.1128/MCB.02384-06 (2007).
- 354 7 Blow, J. J. & Dutta, A. Preventing re-replication of chromosomal DNA. *Nat Rev Mol Cell*  
355 *Biol* **6**, 476-486, doi:10.1038/nrm1663 (2005).
- 356 8 Kuipers, M. A. *et al.* Highly stable loading of Mcm proteins onto chromatin in living cells  
357 requires replication to unload. *J Cell Biol* **192**, 29-41, doi:10.1083/jcb.201007111 (2011).
- 358 9 Gambus, A. Termination of Eukaryotic Replication Forks. *Adv Exp Med Biol* **1042**, 163-  
359 187, doi:10.1007/978-981-10-6955-0\_8 (2017).
- 360 10 Roseaulin, L. C. *et al.* Coordinated degradation of replisome components ensures genome  
361 stability upon replication stress in the absence of the replication fork protection complex.  
362 *PLoS Genet* **9**, e1003213, doi:10.1371/journal.pgen.1003213 (2013).
- 363 11 Prasanth, S. G., Mendez, J., Prasanth, K. V. & Stillman, B. Dynamics of pre-replication  
364 complex proteins during the cell division cycle. *Philos Trans R Soc Lond B Biol Sci* **359**, 7-  
365 16, doi:10.1098/rstb.2003.1360 (2004).
- 366 12 Toledo, L. I. *et al.* ATR prohibits replication catastrophe by preventing global exhaustion of  
367 RPA. *Cell* **155**, 1088-1103, doi:10.1016/j.cell.2013.10.043 (2013).
- 368 13 Leonhardt, H. *et al.* Dynamics of DNA replication factories in living cells. *J Cell Biol* **149**,  
369 271-280, doi:10.1083/jcb.149.2.271 (2000).
- 370 14 Braun, K. A. & Breeden, L. L. Nascent transcription of MCM2-7 is important for nuclear  
371 localization of the minichromosome maintenance complex in G1. *Mol Biol Cell* **18**, 1447-  
372 1456, doi:10.1091/mbc.e06-09-0792 (2007).
- 373 15 Lin, J. J., Milhollen, M. A., Smith, P. G., Narayanan, U. & Dutta, A. NEDD8-targeting drug  
374 MLN4924 elicits DNA rereplication by stabilizing Cdt1 in S phase, triggering checkpoint  
375 activation, apoptosis, and senescence in cancer cells. *Cancer Res* **70**, 10310-10320,  
376 doi:10.1158/0008-5472.CAN-10-2062 (2010).
- 377 16 Taipale, M. *et al.* A quantitative chaperone interaction network reveals the architecture of  
378 cellular protein homeostasis pathways. *Cell* **158**, 434-448, doi:10.1016/j.cell.2014.05.039  
379 (2014).
- 380 17 Santosa, V., Martha, S., Hirose, N. & Tanaka, K. The fission yeast minichromosome  
381 maintenance (MCM)-binding protein (MCM-BP), Mcb1, regulates MCM function during

- 382 prereplicative complex formation in DNA replication. *J Biol Chem* **288**, 6864-6880,  
383 doi:10.1074/jbc.M112.432393 (2013).
- 384 18 Nishiyama, A., Frappier, L. & Mechali, M. MCM-BP regulates unloading of the MCM2-7  
385 helicase in late S phase. *Genes Dev* **25**, 165-175, doi:10.1101/gad.614411 (2011).
- 386 19 Kimura, H., Ohtomo, T., Yamaguchi, M., Ishii, A. & Sugimoto, K. Mouse MCM proteins:  
387 complex formation and transportation to the nucleus. *Genes Cells* **1**, 977-993 (1996).
- 388 20 Ghosh, S., Vassilev, A. P., Zhang, J., Zhao, Y. & DePamphilis, M. L. Assembly of the  
389 human origin recognition complex occurs through independent nuclear localization of its  
390 components. *J Biol Chem* **286**, 23831-23841, doi:10.1074/jbc.M110.215988 (2011).
- 391 21 Scorah, J. & McGowan, C. H. Claspin and Chk1 regulate replication fork stability by  
392 different mechanisms. *Cell Cycle* **8**, 1036-1043, doi:10.4161/cc.8.7.8040 (2009).
- 393 22 Spies, J. *et al.* 53BP1 nuclear bodies enforce replication timing at under-replicated DNA to  
394 limit heritable DNA damage. *Nat Cell Biol* **21**, 487-497, doi:10.1038/s41556-019-0293-6  
395 (2019).
- 396 23 Moreno, A. *et al.* Unreplicated DNA remaining from unperturbed S phases passes through  
397 mitosis for resolution in daughter cells. *Proc Natl Acad Sci U S A* **113**, E5757-5764,  
398 doi:10.1073/pnas.1603252113 (2016).
- 399 24 Jackson, D. A. & Pombo, A. Replicon clusters are stable units of chromosome structure:  
400 evidence that nuclear organization contributes to the efficient activation and propagation of  
401 S phase in human cells. *J Cell Biol* **140**, 1285-1295, doi:10.1083/jcb.140.6.1285 (1998).
- 402 25 Somyajit, K. *et al.* Redox-sensitive alteration of replisome architecture safeguards genome  
403 integrity. *Science* **358**, 797-802, doi:10.1126/science.aao3172 (2017).
- 404 26 Zeman, M. K. & Cimprich, K. A. Causes and consequences of replication stress. *Nat Cell*  
405 *Biol* **16**, 2-9, doi:10.1038/ncb2897 (2014).
- 406 27 Jackson, V. In vivo studies on the dynamics of histone-DNA interaction: evidence for  
407 nucleosome dissolution during replication and transcription and a low level of dissolution  
408 independent of both. *Biochemistry* **29**, 719-731, doi:10.1021/bi00455a019 (1990).
- 409 28 Daigh, L. H., Liu, C., Chung, M., Cimprich, K. A. & Meyer, T. Stochastic Endogenous  
410 Replication Stress Causes ATR-Triggered Fluctuations in CDK2 Activity that Dynamically  
411 Adjust Global DNA Synthesis Rates. *Cell Syst* **7**, 17-27 e13, doi:10.1016/j.cels.2018.05.011  
412 (2018).
- 413 29 Matson, J. P. *et al.* Intrinsic checkpoint deficiency during cell cycle re-entry from  
414 quiescence. *J Cell Biol* **218**, 2169-2184, doi:10.1083/jcb.201902143 (2019).
- 415 30 Das, M., Singh, S., Pradhan, S. & Narayan, G. MCM Paradox: Abundance of Eukaryotic  
416 Replicative Helicases and Genomic Integrity. *Mol Biol Int* **2014**, 574850,  
417 doi:10.1155/2014/574850 (2014).
- 418 31 Shima, N. *et al.* A viable allele of Mcm4 causes chromosome instability and mammary  
419 adenocarcinomas in mice. *Nat Genet* **39**, 93-98, doi:10.1038/ng1936 (2007).
- 420 32 Kunnev, D. *et al.* DNA damage response and tumorigenesis in Mcm2-deficient mice.  
421 *Oncogene* **29**, 3630-3638, doi:10.1038/onc.2010.125 (2010).
- 422
- 423
- 424
- 425
- 426

427 **Acknowledgements:**

428 Research funding was provided by the Novo Nordisk Foundation (grant NNF14CC0001), the  
429 Danish Cancer Society (grant R204 A12615) to J.L. H.S. was supported by the Novo Nordisk  
430 Foundation (grant NNF16CC0020906). K.S. was supported by the Danish Council for Independent  
431 Research (grant EDFF-FSS 82262) and the Lundbeck Foundation (grant R264-2017-2819).  
432 R.G. was supported by a European Molecular Biology Organization long-term postdoctoral  
433 fellowship (ALTF271-2014). C.C. was supported by the Hallas Møller Investigator Fellowship  
434 from the Novo Nordisk Foundation (NNF14OC0008541) and by the European Union's Horizon  
435 2020 research and innovation program (grant 648039). We thank J. Bulkescher and J. Dreier from  
436 the Protein Imaging Platform for their assistance with microscopy and image analysis. FACS  
437 analyses were carried out at CPR and Danstem Flow Cytometry Platform. The pX335 and pX458  
438 plasmids were a gift from F. Zhang, MLN4924 was a gift from J. Duxin, and siRNAs against  
439 CDC45 and GINS1 were kindly gifted by L. Toledo. CHO cell line ectopically expressing MCM4-  
440 Emerald and RFP-PCNA was a gift from D. Gilbert. We sincerely thank C. Lukas for conceptual  
441 and technical inputs to this study and members of the Lukas lab for stimulating discussions and  
442 critical comments on the manuscript.

443

444 **Author contributions:**

445 H.S. K.S. and J.L. conceived the project and planned the study. H.S. performed experiments and  
446 prepared figures. H.S. generated all the cell lines with the help of M.-B.R. K.S. performed IOD  
447 analysis. R.G. carried out proteomic data acquisition under the supervision of C.C. H.S. K.S. and  
448 J.L. analyzed the data and wrote the manuscript. All authors read and commented on the  
449 manuscript.

450

451 **Competing interests:** The authors declare no competing interests.

452

453 **Materials & correspondence:** Should be addressed to K.S. or J.L.

454

455

456

457

458 **Methods**

459 **Cell culture**

460 The human U2OS osteosarcoma cell line (authenticated by STR profiling, IdentiCell molecular  
461 diagnostics) were grown in Dulbecco's modified Eagle's medium (DMEM, high glucose,  
462 Glutamax) containing 10% FBS and penicillin-streptomycin antibiotics (Thermo Fisher Scientific),  
463 under standard cell culture conditions (5% CO<sub>2</sub>, humidified atmosphere). All cell lines used and  
464 generated in this study were routinely tested for mycoplasma contamination (MycoAlert, Lonza).

465

466 **Cell lines**

467 **CRISPR/Cas9 generation of endogenously tagged cell lines**

468 U2OS cells expressing C-terminally endogenously tagged proteins of interest were generated using  
469 CRISPR-Cas9 mediated homology-directed repair as described<sup>33,34</sup>. Paired guide RNAs (gRNA) for  
470 specified genomic locus (MCM2: guide#1 TAGGGCCTCAGAACTGCTGC and guide#2  
471 GCCATCCATAAGGATTCCTT, MCM4: guide#1 AAGGCTTCAGAGCAAGCGCA and guide#2  
472 CTGCTTGCTGCACGCCACAT, CDC45: guide#1 GCATCAGGGTCGGGCTCTGA and guide#2  
473 GCTCTGTCCTCCCTCAACGG) were inserted into pX335-U6-Chimeric\_BB-CBh-  
474 hSpCas9n(D10A) (Addgene plasmid #42335, a gift from Feng Zhang) via *Bbs*I restriction site. For  
475 generation of MCMBP-AID-mEGFP cell line, single guide RNA  
476 (GTAATACCTATGAAGAGTAA) was cloned into pX458-pSpCas9(BB)-2A-GFP (gift from Feng  
477 Zhang, Addgene plasmid #48138) via *Bbs*I restriction site. U2OS cells were transfected by  
478 Lipofectamine LTX Plus reagent (Thermo Fisher Scientific, 15338-100) according to  
479 manufacturer's recommendations with plasmids (pX335/pX458) containing cloned gRNA and  
480 donor plasmid containing the tag (mEGFP/AID-mEGFP/Halo) with flexible linker flanked by 900  
481 bp homology arms complementary to the C-terminus of specific gene. Transfected cells were

482 expanded before cell sorting of GFP-positive cells to obtain population of U2Os cells expressing  
483 proteins tagged by mEGFP. For generation of cells expressing Halo-Tag, cells were pulsed for 30  
484 min with cell permeable TMR-552 ligand (Promega, G8251) in final labeling concentration (1  $\mu$ M)  
485 followed by 30 min wash with fresh DMEM media before cell sorting. After 5 days, sorted cells  
486 were serially diluted into 100-mm dishes to obtain single isolated colonies. Individual colonies  
487 representing clonal cell population were isolated and expanded for their further characterization by  
488 both, western blotting (with antibody against GFP/Halo and MCM2/MCM4/CDC45/MCMBP), and  
489 junction PCR at specified genomic locus followed by Sanger sequencing. 2-3 clones of each cell  
490 line with homozygous tagging of all alleles were further functionally validated by  
491 immunofluorescence (sub-cellular localization of tagged-protein in a direct comparison with  
492 antibody-based staining) and immunoprecipitation (where interaction of tagged proteins and its key  
493 partners were tested). Only cell lines which passed all validation steps were used in final  
494 experiments.

495

#### 496 **MCMBP-KO cell line**

497 Knock-out of MCMBP gene in U2OS cells was generated using single gRNA  
498 (AGGGGAACTTCGTTTCAGTGA - targeting exon 3) or (AAATGGAGTTAATCCTGACT –  
499 targeting exon 2) cloned into pX458-pSpCas9(BB)-2A-GFP via *BbsI* restriction site followed by  
500 Lipofectamine LTX Plus transfection. After 2 days, transfected cells were sorted for GFP-Cas9  
501 positive cells. After 5 days, sorted cells were serially diluted into 100-mm dishes to obtain single  
502 isolated colonies. Clonal cell lines were expanded and further tested for knock-out of MCMBP gene  
503 by western blot (with antibody against MCMBP) and Sanger sequencing of gRNA targeting sites.  
504 Three cell clones for each gRNA containing knock-out of MCMBP gene were selected for



505 phenotype testing. All tested clones showed the same phenotype and are represented by 2 clones  
506 (#1 and #2) in this study.

507 MCMBP-KO cell line expressing C-terminally Halo-tagged MCM2/MCM4 were generated with  
508 the same procedure as described above. For complementation assays, turboGFP-MCMBPwt  
509 (Origine NM\_024834) or turboGFP-MCMBP $\Delta$ NLS (bipartite NLS was identified using cNLS  
510 Mapper<sup>35</sup> generated by site directed QuickChange II XL Site-Directed Mutagenesis kit (Agilent,  
511 200522) with primers (forward:  
512 GTCCCTCAACATCCTACACTCCTAGTGGGAGTGTTGGTGGTCTTC and reverse:  
513 CCATTGAAGACCACCAACTCCCCTAGGAGTGTAGGATGTTG) were transfected using  
514 Lipofectamine LTX Plus reagent into MCMBP-KO cells. Next day, transfected cells were serially  
515 diluted into 100-mm dishes and selected with DMEM medium containing 400  $\mu$ g/ml Geneticin  
516 (Gibco, 10131-027) for approx. 12 days to obtain single isolated colonies. Individual colonies were  
517 isolated and transferred to 24-well plates. Clonal cell lines were expanded and further tested by  
518 fluorescence microscopy for MCMBP cellular localization and the level of expression was tested by  
519 western blot (with antibody against MCMBP/tGFP).

520

#### 521 **MCMBP-degron cell line**

522 MCMBP-AID-mEGFP cell line for auxin induced MCMBP degradation (expressing C-terminally  
523 AID-mEGFP-tagged MCMBP) was generated and validated for homozygous tagging of all alleles  
524 with the procedure as described above. Afterward, cells were transfected using Lipofectamine LTX  
525 Plus reagent with plasmid (pCMV6-A-puro-TIR1-9xMyc) which contains codon-optimized  
526 (specific for human) TIR1 gene (paralog of Arabidopsis thaliana AFB2 gene). Next day, transfected  
527 cells were serially diluted into 100-mm dishes and selected with DMEM medium containing  
528 puromycin (1  $\mu$ g/ml; Gibco, A11138-03) for 2-3 weeks to obtain single isolated colonies. Individual



529 colonies were isolated and expanded. Ectopic expression of TIR1 was tested by  
530 immunofluorescence and western blot (using antibody against Myc). MCMBP degradation was  
531 achieved by the addition of indole-3-acetic acid (IAA; Sigma-Aldrich, I5148-10G) in final  
532 concentration 0.5 mM in fresh DMEM media. MCMBP-AID-mEGFP/TIR1-Myc cell line  
533 expressing C-terminally Halo-tagged of MCM4 was generated with the same procedure as  
534 described above.

535

### 536 **Cell lines with ectopically expressing proteins**

537 U2OS cells endogenously expressing C-terminal mEGFP-tagged MCM2 were transfected with  
538 plasmid (pCellCycleChromobody-RFP) containing RFP-PCNA chromobody (Chromotek, ccr)  
539 encoding single chain antibody recognizing endogenous PCNA protein. Single clones were selected  
540 under continuous growth in puromycin (1 µg/ml).

541 By the same procedure, stably overexpressing GFP-PCNA chromobody (pCellCycleChromobody-  
542 GFP) were introduced into U2OS cells containing endogenously Halo-tagged MCM4 and  
543 MCMBP-KO cells with endogenously Halo-tagged MCM4.

544 For generation of U2OS cells expressing FLAG-MCMBP, cells were transfected with FLAG3x-  
545 MCMBP subcloned from MCMBPwt-turboGFP. Single clones were selected with Geneticin (G418,  
546 10131-027, 400 µg/ml).

547

### 548 **Drugs and Supplements**

549 Cycloheximide (Sigma-Aldrich, C7698-1G, 12.5 µg/ml), MG132 (Calbiochem, 474790-10MG, 2  
550 µM), camptotecin (Sigma-Aldrich, 208925-50MG), MLN4924 (R&Dsystems, I-502-01M, 5 µM)  
551 were used for indicated timepoints. CldU and IdU (Sigma-Aldrich) and EdU (Thermo Fisher  
552 Scientific, 31985070) were used as indicated.

553 **Gene silencing by siRNA**

554 Cell transfection with siRNAs (Ambion Silencer Select) was performed using Lipofectamine  
555 RNAiMax (Thermo Fisher Scientific, 13778075) at a concentration of 10 nM MCMBP (s36586),  
556 CDC6 (s2744), CDC45 (s15829), GINS1 (custom made with sequence for #sense  
557 AAAACCAGUCUGAUGUGAAU[dT][dT] and #antisense AUUCACAUCAGACUGGUUUU  
558 [dT][dT]), 5 nM CLASPIN (s34330) and 1 nM CDT1 (s37723). Non-targeting siRNA (Ambion  
559 negative control #1) was used as control siRNA in all experiments.

560

561 **Antibodies**

562 Antibody for immunofluorescence (IF) or western blot (WB) were used as follows: 53BP1 (mouse,  
563 Milipore, MAB3802, 1:1000 for IF), alpha-tubulin (mouse, Santa Cruz, sc-5286, 1:1000 for WB),  
564 CDC45 (rabbit, Cell Signaling Technology, 11881S, 1:1000 for WB), CDT1 (rabbit, Abcam,  
565 ab202067, 1:1000 for IF), cyclin A (rabbit, Santa Cruz, sc-751, 1:500 for IF), FLAG M2 (mouse,  
566 Sigma-Aldrich, F1804, 1:1000 for WB), GFP (rabbit, Chromotek, PABG1-100, 1:1000 for WB),  
567 turboGFP (rabbit, Thermo Fischer Scientific, PA5-22688, 1:1000 for WB), GINS4 (rabbit, Novus  
568 Biologicals, NBP2-16659, 1:1000 for WB), H2AX-phospho-S139 (mouse, Biolegend, 613401,  
569 1:1000 for IF), H3 (rabbit, Abcam, ab1791, 1:5000 for WB), Halo (mouse, Promega, G9211,  
570 1:1000 for WB), KAP-1 (rabbit, Bethyl Laboratories, A300-274A, 1:2000 for WB), MCM2  
571 (mouse, Novus Biologicals, H000041171-M01, 1:1000 for IF, 1:1000 for WB), MCM3 (mouse,  
572 Santa Cruz, sc-390480, 1:500 for IF, 1:1000 for WB), MCM4 (mouse, Novus Biologicals,  
573 H00004173-B01P, 1:500 for IF, 1:500 for WB), MCM5 (rabbit, Abcam, ab17967, 1:1000 for IF,  
574 1:2000 for WB), MCM6 (rabbit, Novus Biologicals, NBP1-82642, 1:200 for IF, 1:1000 for WB),  
575 MCM7 (mouse, Santa Cruz, sc-9966, 1:1000 for IF, 1:1000 for WB), MCMBP (rabbit, Novus  
576 Biologicals, NBP1-90746, 1:500 for IF, 1:2000 for WB), Myc (mouse, Abcam, ab32, 1:1000),

577 PCNA (human, Immuno Concepts, 2037, 1:500 for IF), PCNA (mouse, Santa Cruz, sc-56, 1:1000  
578 for WB), RPA32-phospho-S33 (rabbit, Bethyl Laboratories, A300-246A, 1:500 for IF), RPA70  
579 (rabbit, Abcam, ab79398, 1:1000 for IF), TIMELESS (rabbit, Abcam, ab109512, 1:500 for IF,  
580 1:1000 for WB).  
581 Secondary antibody conjugates for IF were goat anti-mouse and goat anti rabbit Alexa Fluor 488  
582 (A11029, A11034), Alexa Fluor 568 (A11031, A11036) Alexa Fluor 647 (A21236, A21245) (all  
583 from Thermo Fischer Scientific, 1:1000) and donkey anti-human Alexa Fluor 647 (Jackson Immuno  
584 Research, 709-605-149, 1:1000). Secondary antibody conjugates for WB were HRP horse anti-  
585 mouse IgG antibody (Vector Laboratories, PI-2000, 1:10000) and HRP goat anti-rabbit IgG  
586 antibody (Vector Laboratories, PI-1000, 1:10000).

587

#### 588 **Western blot**

589 To obtain whole cell extracts, cells were incubated with lysis buffer (10 mM HEPES pH 7.5, 500  
590 mM NaCl, 1 mM EDTA, 1% NP-40) supplemented with protease and phosphatase inhibitors  
591 (ROCHE) and benzonase (Sigma-Aldrich, E1014-25KU) followed by analysis by NuPAGE 4-12%  
592 Bis-Tris gel (Thermo Fischer Scientific) after boiling samples in reducing buffer containing DTT as  
593 per standard procedures. Primary antibodies were diluted in PBS-Tween containing 5% powdered  
594 milk and incubated overnight at 4 °C. Secondary peroxidase-coupled antibodies were incubated for  
595 1 hour at room temperature. ECL-based chemiluminiscence reagent (Amersham, RPN2106) was  
596 used for detection with an Odyssey-Fc system.

597

#### 598 **Immunoprecipitation (IP)**

599 For IP from whole cell extracts, U2OS cells expressing MCMBP-FLAG or MCM4-GFP or CDC45-  
600 GFP were harvested and lysed in RIPA buffer (Sigma-Aldrich, R0278-500ML) supplemented with

601 protease and phosphatase inhibitors and benzonase. Whole cell extracts were incubated with anti-  
602 FLAG M2 magnetic beads (Sigma-Aldrich, F7425) or GFP-Trap magnetic beads (Chromotek,  
603 gtma-20) for 2 hrs at 4 °C. To elute bound proteins, beads were incubated with 200 µg/ml 3x FLAG  
604 peptides (Sigma-Aldrich, F4799-4MG) for 2 hrs at 4 °C. In case of GFP-trap, bound proteins were  
605 eluted by β-mercaptoethanol for 30 min at 95 °C. The immunoprecipitates were then analyzed with  
606 western blot with antibodies against indicated proteins or processed for mass spectrometry analysis.  
607 For IP from soluble and chromatin fraction, the subcellular fractionation was performed from U2OS  
608 expressing MCMBP-FLAG or MCM4-GFP or CDC45-GFP. The harvested cell pellets were  
609 resuspended in hypotonic buffer (10 mM HEPES pH 7.5, 1.5 mM MgCl<sub>2</sub>, 5 mM KCl, 1 mM DTT,  
610 0.5% NP40) supplemented by protease and phosphatase inhibitors, EtBr, 5% glycerol and RNaseA  
611 and incubated 2 min on ice and then centrifuged at 16000 g for 5 min. The soluble fraction was  
612 collected and adjusted to 500 mM NaCl to maintain the same salt concentration as in chromatin  
613 fraction. Next, pellet was washed by washing buffer (10 mM HEPES pH 7.5, 5 mM NaCl, 0.3 M  
614 sucrose supplemented by protease and phosphatase inhibitors) and centrifuged at 16000 g for 5 min.  
615 The washing step was repeated twice. Finally, the pellets were resuspended in chromatin-lysis  
616 buffer (10 mM HEPES pH 7.5, 500 mM NaCl, 5 mM KCl, 1mM EDTA, 1% NP40) supplemented  
617 by protease and phosphatase inhibitors, EtBr, 5% glycerol, RNaseA and benzonase and incubated  
618 45 min on ice followed by sonication at low amplitude and then centrifuged at 16000 g for 30 min.  
619 Soluble and chromatin fractions were applied on anti-FLAG M2 or GFP-Trap magnetic beads with  
620 the same procedure as described above.

621

## 622 **SILAC-based mass spectrometry and analysis of MCMBP-interactome**

623 For SILAC experiments, naïve U2OS cells were grown in medium containing unlabeled L-arginine  
624 and L-lysine (Arg<sup>0</sup>/Lys<sup>0</sup>) as the light condition and U2OS cells expressing MCMBP-FLAG were

625 grown in medium containing isotope-labeled variants of L-arginine and L-lysine (Arg10/Lys8) as  
626 the heavy condition. FLAG-IP was performed as described above. Proteins eluted from beads were  
627 boiled in 30  $\mu$ l 4x NuPAGE LDS sample buffer (Invitrogen) containing 1 mM DTT followed by  
628 alkylation with 5.5 mM chloroacetamide. Next, the proteins were resolved on NuPAGE Novex Bis-  
629 Tis 4-12 % gel (Invitrogen), the gel was stained with Novex colloidal blue stain (Invitrogen) and  
630 subsequently destained with water. Lanes for each sample were sliced and destained further with a  
631 buffer containing 25 mM ammonium bicarbonate and 50% ethanol. Dehydration of gel pieces was  
632 done by addition of 100% ethanol followed by protein in-gel digestion with trypsin (Sigma-Aldrich)  
633 at 37 °C for 16 hrs. The gel pieces were treated with trifluoroacetic acid and the resulting peptides  
634 were eluted with increasing concentration of acetonitrile and desalted on reversed-phase C18  
635 StageTips<sup>36</sup>. Peptides were eluted from StageTips by 40  $\mu$ l of elution buffer containing 60%  
636 acetonitrile and 0.1% trifluoroacetic acid and then acetonitrile concentration was reduced in the  
637 eluates to less than 5 % by vacuum centrifugation. Before injecting into mass spectrometer, the  
638 peptides were diluted with buffer containing 0.5% acetic acid and 0.1% trifluoroacetic acid. The  
639 raw data files were analyzed using MaxQuant (version 1.5.2.8). Parent ion and MS/MS spectra  
640 were searched using Andromeda search engine<sup>37</sup>, a database against human proteome obtained from  
641 the UniProtKB (released in February 2012). To search for tandem mass spectra following settings  
642 were used: mass spectra tolerance of 6 ppm (MS mode), mass tolerance of 20 ppm (HCD MS2  
643 mode), strict trypsin specificity and maximum 2 missed cleavages were allowed. N-terminal protein  
644 acetylation, and methionine oxidation were searched as variable modifications, whereas cysteine  
645 carbamidomethylation was searched as a fixed modification. The dataset was filtered based on  
646 posterior error probability (PEP) to arrive at a false discovery rate of below 1% estimated from a  
647 target-decoy approach. Table with SILAC ratio were then exported and analyzed in TIBCO  
648 Software to generate rank plot for MCMBP-interactome.

649 **HaloTag ligands and labeling protocol**

650 For HaloTag labeling protocol (i) used in Fig. 1a, b and Extended Data Fig. 1e, cells expressing  
651 MCM4-Halo were pulsed with Janelia Fluor 549 (JF549) HaloTag ligand (Promega, GA1111) in  
652 final labeling concentration 200 nM for 20 min, washed three times with fresh DMEM medium and  
653 incubated fresh DMEM medium containing non-fluorescent blocking ligand in final labeling  
654 concentration 100  $\mu$ M for indicated timepoints. Non-fluorescent blocking ligand was prepared as  
655 described<sup>38</sup>. Briefly, 100 mM HaloTag Succinimidyl Ester (O4) ligand was incubated with 500 mM  
656 Tris-HCl (pH 8.0) for 60 min at 25 °C to mask the functional groups. For HaloTag labeling protocol  
657 (ii) used in Fig. 1a, b and Extended Data Fig. 1e, cells expressing MCM4-Halo were incubated with  
658 JF549 HaloTag ligand in final labeling concentration 200 nM for indicated timepoints.

659 For dual-HaloTag labeling protocol, U2OS/MCMBP-degron/MCMBP-KO cells expressing  
660 MCM4-Halo/MCM2-Halo were incubated with JF549 HaloTag ligand in final labeling  
661 concentration 200 nM for 20 min, washed three times with fresh DMEM medium and incubated  
662 DMEM medium containing non-fluorescent blocking ligand in final labeling concentration 100  $\mu$ M  
663 for 2 hours. After incubation, non-fluorescent blocking ligand was washed out and cells were  
664 additionally washed three times with fresh DMEM medium and incubated DMEM medium  
665 containing Janelia Fluor 646 (JF646) HaloTag ligand (Promega, GA1121) in final labeling  
666 concentration 200 nM for indicated timepoints.

667

668 **Immunofluorescence (IF) staining**

669 Cells were grown on round 12 mm diameter, 1.5 mm thick glass coverslips (cleaned in 96 %  
670 ethanol, dried and autoclaved; Menzel-Glaser, 6307356). For immunostaining of chromatin bound  
671 proteins, cells were pre-extracted with ice-cold PBS containing 0.2% TritonX-100 for 2 min on ice  
672 before fixation 4% buffered formaldehyde for 15 min at room temperature. For immunostaining of

673 nuclear pool of proteins, cells were without pre-extraction fixed with 4% buffered formaldehyde for  
674 15 min at room temperature. When HaloTag labeling protocol was performed, cells were incubated  
675 with indicated HaloTag ligands for specified timepoints (for details see HaloTag ligands and  
676 labeling protocol, and schematic protocols in figures) before fixation (with/without preceding pre-  
677 extraction). When Click-iT EdU staining was performed, cells were incubated with 10  $\mu$ M EdU for  
678 20 min before pre-extraction and fixation. EdU detection was performed according to the  
679 manufacturer's recommendations (Thermo Fisher Scientific) before incubation with primary  
680 antibodies. Primary and secondary antibodies were diluted in DMEM medium containing 10% FBS  
681 and 0.05% sodium azide (filtered through a 0.2  $\mu$ m filter) and incubated at room temperature for 90  
682 min and 30 min, respectively. For DAPI staining, secondary antibody solution was supplemented  
683 with 4',6'-diamidino-2-phenylindole-dihydrochloride (DAPI, 0.5  $\mu$ g/ml). After staining, coverslips  
684 were washed three times with PBS and additionally twice in distilled water, dried and mounted with  
685 Mowiol-based mounting medium (Mowiol 488 (Calbiochem), glycerol, Tris-HCl pH 8.5).

686

### 687 **Quantitative image-based cytometry (QIBC)**

688 QIBC was performed as previously described<sup>12,39</sup>. Images were acquired using ScanR inverted  
689 high-content screening microscope (Olympus) equipped with wide-field optics, UPLSAPO dry  
690 objective (20x, 0.75-NA), fast excitation and emission filter-wheel devices for DAPI, FITC, Cy3  
691 and Cy5 wavelengths, an MT20 illumination system and a digital monochrome Hamamatsu ORCA-  
692 R2 CCD camera (yielding a spatial resolution of 320 nm per pixel at 20x and binning of 1). Images  
693 were acquired in an automated fashion with the ScanR acquisition software (Olympus 2.7.1). At  
694 least 2000 cells per condition were acquired. Acquired images were processed and analyzed with  
695 ScanR analysis software. A dynamic background correction was applied to all images. The DAPI  
696 signal was used for the generation of an intensity-threshold-based mask to identify individual nuclei

697 as main objects. This mask was then applied to analyze pixel intensities in different channels for  
698 each individual nucleus. After segmentation of nuclei, 53BP1-NB were segmented as above, and  
699 the desired parameters for the different nuclei or foci were quantified, with single parameters (mean  
700 and total intensities, foci count, and foci intensities) as well as calculated parameters (sum of foci  
701 intensity per nucleus). Table with values was then exported and analyzed in TIBCO Software to  
702 quantify absolute, median and average values in cell populations and to generate color-coded scatter  
703 plots. Within one experiment, similar cell numbers were compared for the different conditions and  
704 for visualization jittering was applied (random displacement of objects along the x axis) to make  
705 overlapping markers visible. The mean fluorescence intensity of cytoplasmic MCMs was quantified  
706 with ImageJ software.

707

### 708 **Confocal 3D imaging of live cells**

709 Time-lapse imaging was acquired using an UltraVIEW Vox spinning-disk microscope (Perkin  
710 Elmer) and Volocity software (v.6.3) with a 40x, 1.3-NA Plan-Apochromat oil immersion objective  
711 and appropriate excitation and emission filters. Images were captured using a Hamamatsu EMCCD  
712 16-bit camera at a sampling resolution of 121 nm in the x, y dimensions and 250 nm in the z  
713 dimension. Laser power and exposure time were appropriately adjusted with identical settings  
714 applied within series of experiments. Microscope performance and channel alignment were  
715 regularly checked via the imaging of 200 nm multicolor fluorescent beads.

716 For live cell time-lapse imaging, cells were seeded at appropriate density in imaging dishes (Nunc,  
717 Lab-Tek, 155361) and dual HaloTag labeling protocol (see details above) was performed up to end  
718 of incubation with non-fluorescent blocking ligand. Next after washing steps, the JF646 ligand  
719 diluted in CO<sub>2</sub>-independent medium was added to the cells followed by overlaid with mineral oil to  
720 minimize evaporation. Time-lapse imaging was acquired under stable temperature conditions of



721 37 °C, at 12 different positions using autofocusing (Nikon Eclipse TI microscope equipped with  
722 Nikon Perfect Focus System) and z-stacks (300 nm distance, 15 slices). Recording was performed  
723 for 48 hours with 30 min intervals. Laser power, exposure times and acquisition intervals were  
724 chosen appropriately to minimize sample bleaching. All images displayed in figures represent  
725 single plane projection (SPP) from the center of a 3D stack. Brightness and contrast were linearly  
726 adjusted for optimal presentation for each condition.

727 Nascent and parental MCMs were monitored from G1 phase to the next G1 phase using PCNA to  
728 differentiate between individual phases. G1 phase was determined by homogenous smooth nuclear  
729 distribution of PCNA intensities with heterogenous pattern for parental MCMs reflecting their  
730 loading on chromatin. S phase was determined by the onset and cessation of clearly discernible  
731 PCNA foci and G2 phase with homogenous smooth nuclear distribution of PCNA and parental  
732 MCMs reflecting their eviction from chromatin during S phase. Total intensities of nascent and  
733 parental MCMs were measured using ImageJ software from G1 phase (1<sup>st</sup> timepoint) to the next G1  
734 phase. After background correction, total intensities of nascent and parental MCM4 at 1<sup>st</sup> timepoint  
735 were sum up and taken as 100 percent for calculation of relative percentage of nascent and parental  
736 MCMs in following timepoints separately for U2OS cells or MCMBP-KO cells (or in case of  
737 DMSO or IAA treatment in MCMBP degron cells). For the analysis of MCM dynamics in MCMBP  
738 degron cells (with DMSO or IAA treatment), G1 phase was defined based on heterogenous MCM  
739 pattern reflecting their loading on chromatin (parental MCM4), and G2 phase was demarcated  
740 based on the reverse time points (3-4 frames of time-lapse imaging) preceding mitosis.

741

## 742 **Confocal microscopy**

743 Confocal imaging was carried out on an LSM 880 microscope with Airyscan (Zeiss AxioObserver.  
744 Z1) equipped with an oil immersion objective alpha Plan-Apochromat 100x/1.3 DIC M27. Images

745 were acquired in super-resolution mode using Airyscan detector with appropriate emission filters  
746 for each laser line. Images were processed with deconvolution algorithm in LSM-ZEN software.

747

### 748 **Fluorescence recovery after photobleaching (FRAP)**

749 For FRAP, U2OS cells expressing MCM2-mEGFP and RFP-PCNA were seeded at appropriate  
750 density in imaging dishes (Nunc, Lab-Tek, 155361) and before imaging DMEM medium was  
751 changed for CO<sub>2</sub>-independent medium. RFP-PCNA used to differentiate between individual phases  
752 of cell cycle. FRAP was acquired using an UltraVIEW Vox spinning-disk microscope (Perkin  
753 Elmer) with a 60x, 1.4-NA Plan-Apochromat oil immersion objective under stable temperature  
754 conditions of 37 °C. Volocity software (v.6.3) was used for FRAP setup. After 10 pre-bleaching  
755 frames (pre), a single bleach pulse (488-nm argon laser set to 100% power) was delivered in  
756 defined region (approximately 5 μm in diameter) followed by time-lapse for 35 seconds at  
757 maximum imaging scan (6 frames per second) with the laser transmission attenuated to 2.5%.  
758 Subsequently, the mean GFP-associated fluorescence intensity was extracted for each timepoint in  
759 the following regions: bleaching region ( $I_{\text{frap}}(t)$ ), background fluorescence outside the nucleus  
760 ( $I_{\text{back}}(t)$ ) and fluorescence intensity within the nucleus in which bleaching was performed ( $I_{\text{ref}}(t)$ )<sup>40</sup>.  
761 After background correction, double normalization (equation 1) which corrects for differences in  
762 the starting intensity in  $I_{\text{frap}}$  region and for loss in total nuclear fluorescence in  $I_{\text{ref}}$  region due to the  
763 bleaching pulse and to acquisition bleaching.

$$764 \quad I_{\text{norm}}(t) = \frac{I_{\text{ref\_pre}}}{I_{\text{ref}}(t)} \cdot \frac{I_{\text{frap}}(t)}{I_{\text{frap\_pre}}}$$

765 where

766  $I_{\text{norm}}(t)$  - normalized intensity

767  $I_{\text{frap\_pre}} / I_{\text{ref\_pre}}$  - average of mean intensity in the  $I_{\text{frap}} / I_{\text{ref}}$  regions before bleach moment

768

769 Next, full scale normalization (equation 2) was applied to corrects for differences of the bleaching  
770 efficiencies (all recovery curves start from 0).

$$771 \quad I_{norm_{fc}}(t) = \frac{I_{norm}(t) - I_{norm}(t_{postbleach})}{1 - I_{norm}(t_{postbleach})}$$

772 where

773  $I_{norm_{fc}}(t)$  - full scale normalized intensity

774  $I_{norm}(t_{postbleach})$  - is the first post-bleach value of the double normalized data

775 Mean of full scale normalized FRAP intensities were plotted from 14 cells per phase of cell cycle.

776

### 777 **RT-PCR**

778 Total RNA from U2OS, MCMBP depleted cells using siRNA and MCMBP-KO (clone #1 and #2)

779 cells was isolated using RNeasy Mini Kit (Qiagen, 74104). The cDNA was synthesized using High-

780 Capacity cDNA Reverse Transcription Kit (Thermo Fischer Scientific, 4368814) followed by real-

781 time PCR using primers (MCM2 forward: TGCAAGCCAGGAGACGAGA reverse:

782 CCATTGGCAGTGTTGAGGG, MCM5 forward: ATTGGCTCCCAGGTGTCTGA reverse:

783 GCGAGTCCATGAGTCCAGTG, MCM7 forward: CCCCTCTTTCTCCCATGCTG reverse:

784 AGGCCAGGCTAGAAGATGA) and Brilliant II SYBR Green qPCR Master Mix (Agilent,

785 600828).

786

### 787 **DNA fibers**

788 DNA fibers were performed under same procedure as previously described<sup>25</sup>. Antibodies for DNA

789 fibers were used as follows: for the tracts labeled with CldU (anti-BrdU, rat, Abcam, ab6326,

790 1:100) and IdU (anti-BrdU mouse, Becton Dickinson, 347580, 1:200). Secondary antibodies were

791 goat anti-rat Alexa Fluor 594 IgG (Thermo Fischer Scientific, A21209, 1:100) and goat anti-mouse

792 Alexa Fluor 488 IgG (Thermo Fischer Scientific, A11029, 1:100).

793 For IOD measurements, labeled cells were diluted 1/10 in non-labeled ones prior to fiber  
794 preparation. For anti-ssDNA (Tecan/IBL International 18731, 1:500) antibody was used.

795

## 796 **Clonogenic survival assay**

797 Clonogenic survival experiments were performed as previously described<sup>25</sup>.

798

## 799 **Statistical analysis**

800 All statistical analysis was done using unpaired student t-test or one-way ANOVA in GraphPad  
801 Prism v.7.0b.

802

## 803 **Additional references:**

804

- 805 33 Koch, B. *et al.* Generation and validation of homozygous fluorescent knock-in cells using  
806 CRISPR-Cas9 genome editing. *Nat Protoc* **13**, 1465-1487, doi:10.1038/nprot.2018.042  
807 (2018).
- 808 34 Cong, L. *et al.* Multiplex genome engineering using CRISPR/Cas systems. *Science* **339**,  
809 819-823, doi:10.1126/science.1231143 (2013).
- 810 35 Kosugi, S., Hasebe, M., Tomita, M. & Yanagawa, H. Systematic identification of cell cycle-  
811 dependent yeast nucleocytoplasmic shuttling proteins by prediction of composite motifs.  
812 *Proc Natl Acad Sci U S A* **106**, 10171-10176, doi:10.1073/pnas.0900604106 (2009).
- 813 36 Rappsilber, J., Mann, M. & Ishihama, Y. Protocol for micro-purification, enrichment, pre-  
814 fractionation and storage of peptides for proteomics using StageTips. *Nat Protoc* **2**, 1896-  
815 1906, doi:10.1038/nprot.2007.261 (2007).
- 816 37 Cox, J. *et al.* Andromeda: a peptide search engine integrated into the MaxQuant  
817 environment. *J Proteome Res* **10**, 1794-1805, doi:10.1021/pr101065j (2011).
- 818 38 Yamaguchi, K., Inoue, S., Ohara, O. & Nagase, T. Pulse-chase experiment for the analysis  
819 of protein stability in cultured mammalian cells by covalent fluorescent labeling of fusion  
820 proteins. *Methods Mol Biol* **577**, 121-131, doi:10.1007/978-1-60761-232-2\_10 (2009).
- 821 39 Ochs, F. *et al.* 53BP1 fosters fidelity of homology-directed DNA repair. *Nat Struct Mol Biol*  
822 **23**, 714-721, doi:10.1038/nsmb.3251 (2016).
- 823 40 Rapsomaniki, M. A. *et al.* easyFRAP: an interactive, easy-to-use tool for qualitative and  
824 quantitative analysis of FRAP data. *Bioinformatics* **28**, 1800-1801,  
825 doi:10.1093/bioinformatics/bts241 (2012).
- 826

827

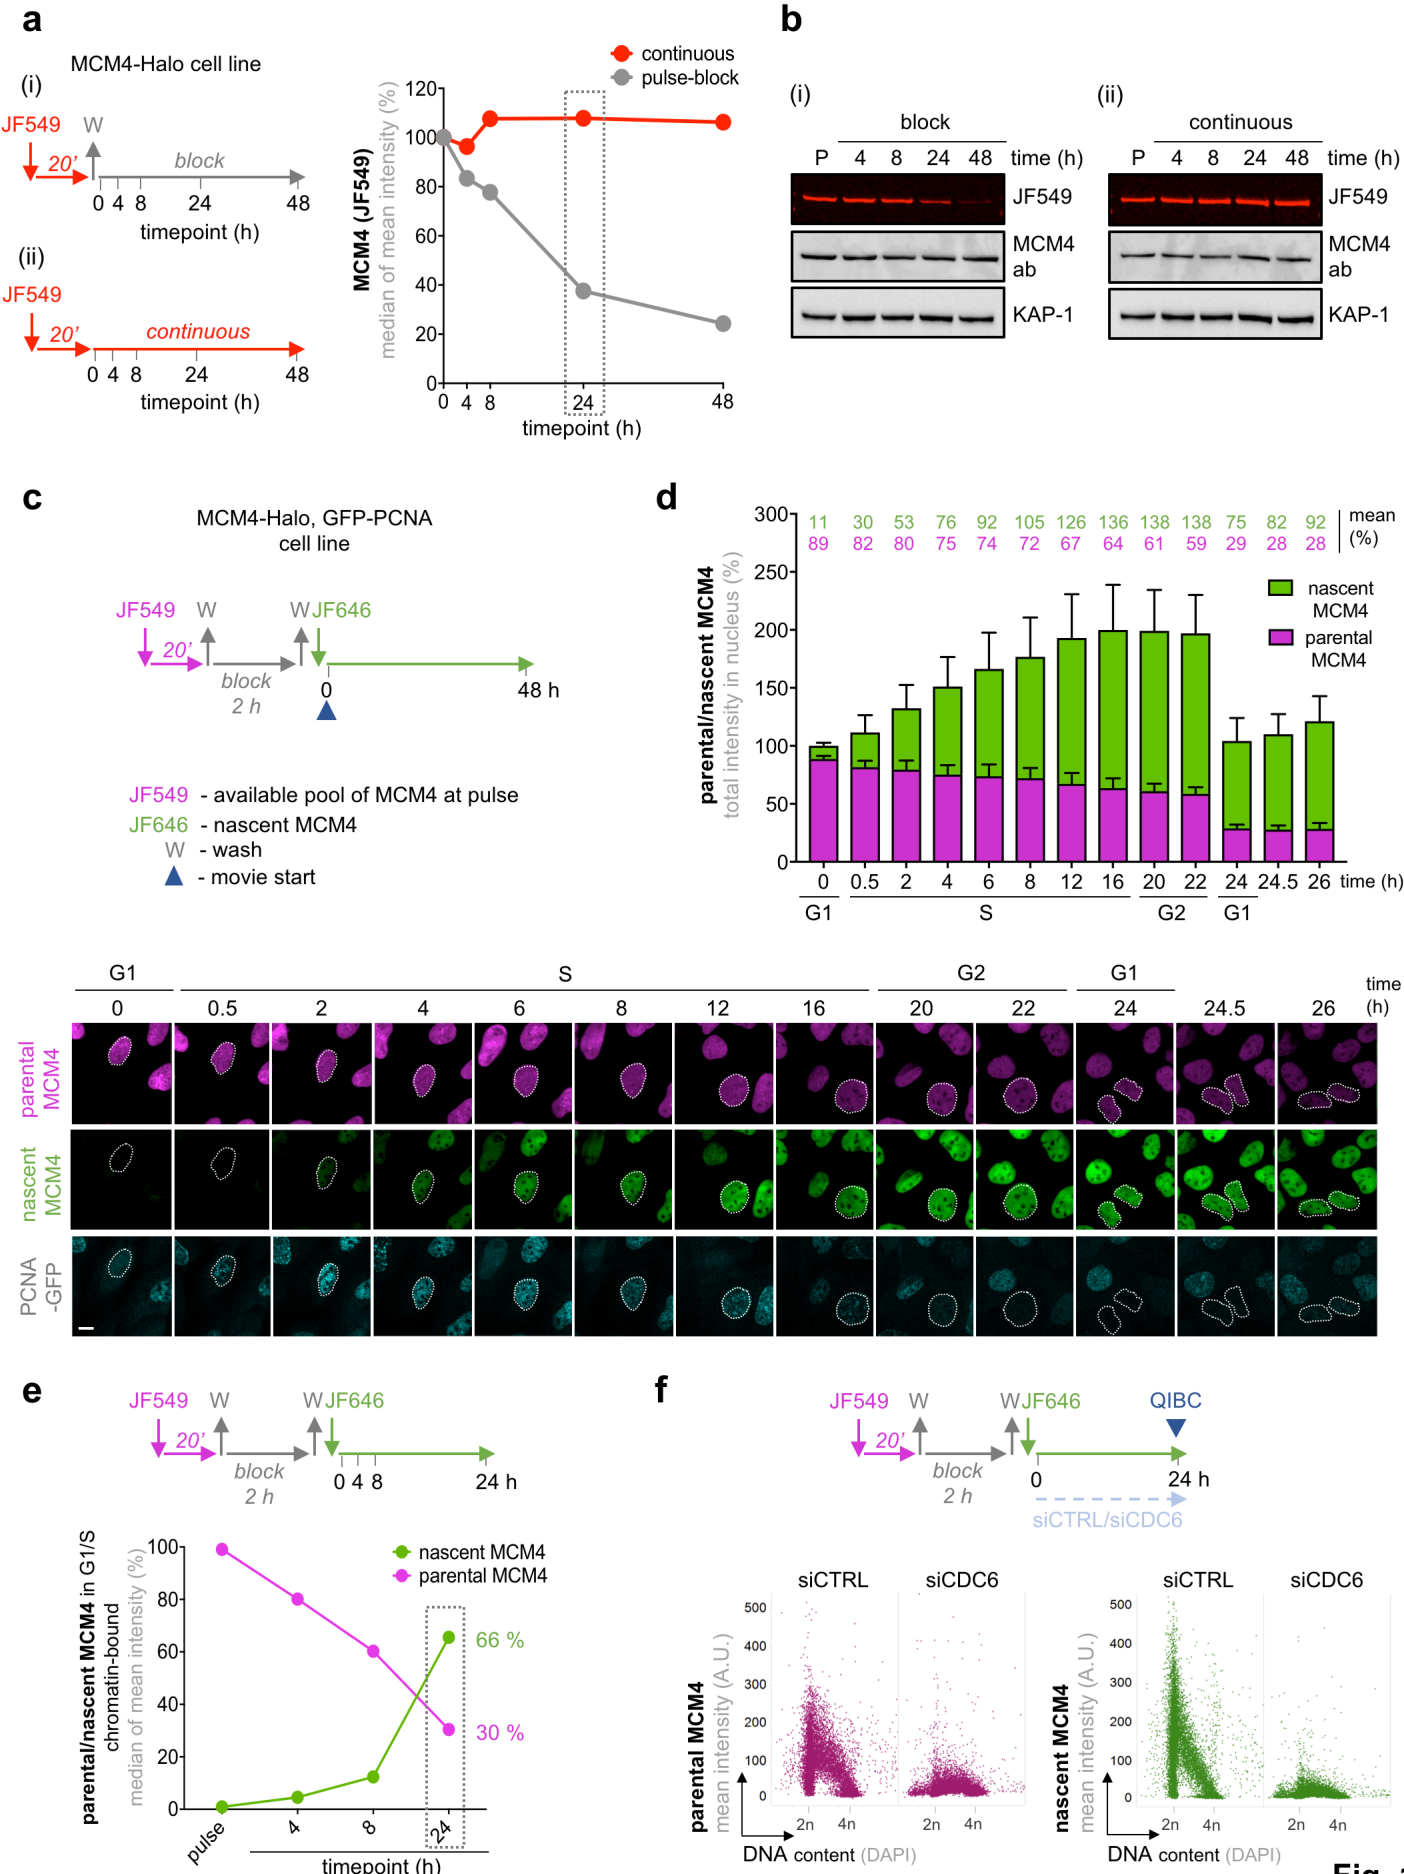

**Fig. 1**

**Fig. 1 | Continuous synthesis of nascent MCMs in mother cells mounts optimal origin**

**licensing in daughter cells. a**, left, MCM4 labeling protocol in U2OS cells endogenously expressing MCM4-Halo (i and ii). JF549, Janelia Fluor dye 549; W, wash. Right, QIBC-based quantification of MCM4-Halo at different intervals of Halo-Ligand labeling.  $n \approx 3500$  cells for each condition. See Extended data Fig. 1e. Box marks the cell doubling time. **b**, Western blotting (WB) of MCM4-Halo from an independent experiment performed as in (a). P: pulse. **c**, Top, MCM4-Halo dual labeling protocol. JF646, Janelia Fluor dye 646. Bottom, single plane projection (SPP) images of U2OS cells endogenously expressing MCM4-Halo and ectopically expressing GFP-PCNA with a dual labeling of MCM4-Halo. Scale bar, 14  $\mu\text{m}$ . Dotted circles show a representative trajectory of parental (magenta) or nascent (green) MCM4 in an individual cell at indicated timepoints for one complete cell cycle marked by PCNA. Also see methods. **d**, Quantification of total intensity of MCM4-Halo fluorescence derived from the data in (c). Total intensity of parental and nascent of MCM4 at the start of time-lapse microscopy was pooled as 100 percent and represented as relative percentage. Each data point indicates mean  $\pm$ SD.  $n = 15$  cells. **e**, Top, MCM4-Halo dual labeling protocol. Bottom, quantification of G1/S-specific chromatin bound nascent and parental MCM4 levels. See also Extended data Fig. 3a. Box marks the cell doubling time. **f**, Top, MCM4-Halo dual labeling protocol. Bottom, QIBC of cells transfected with control or CDC6 siRNAs and stained for chromatin bound MCM4-Halo. Nuclear DNA was counterstained by 4',6-diamidino-2-phenylindole (DAPI). Parental MCM4-Halo (left panel) and nascent MCM4 (right panel).  $n \approx 10\,000$  cells for each condition. A.U., arbitrary units.



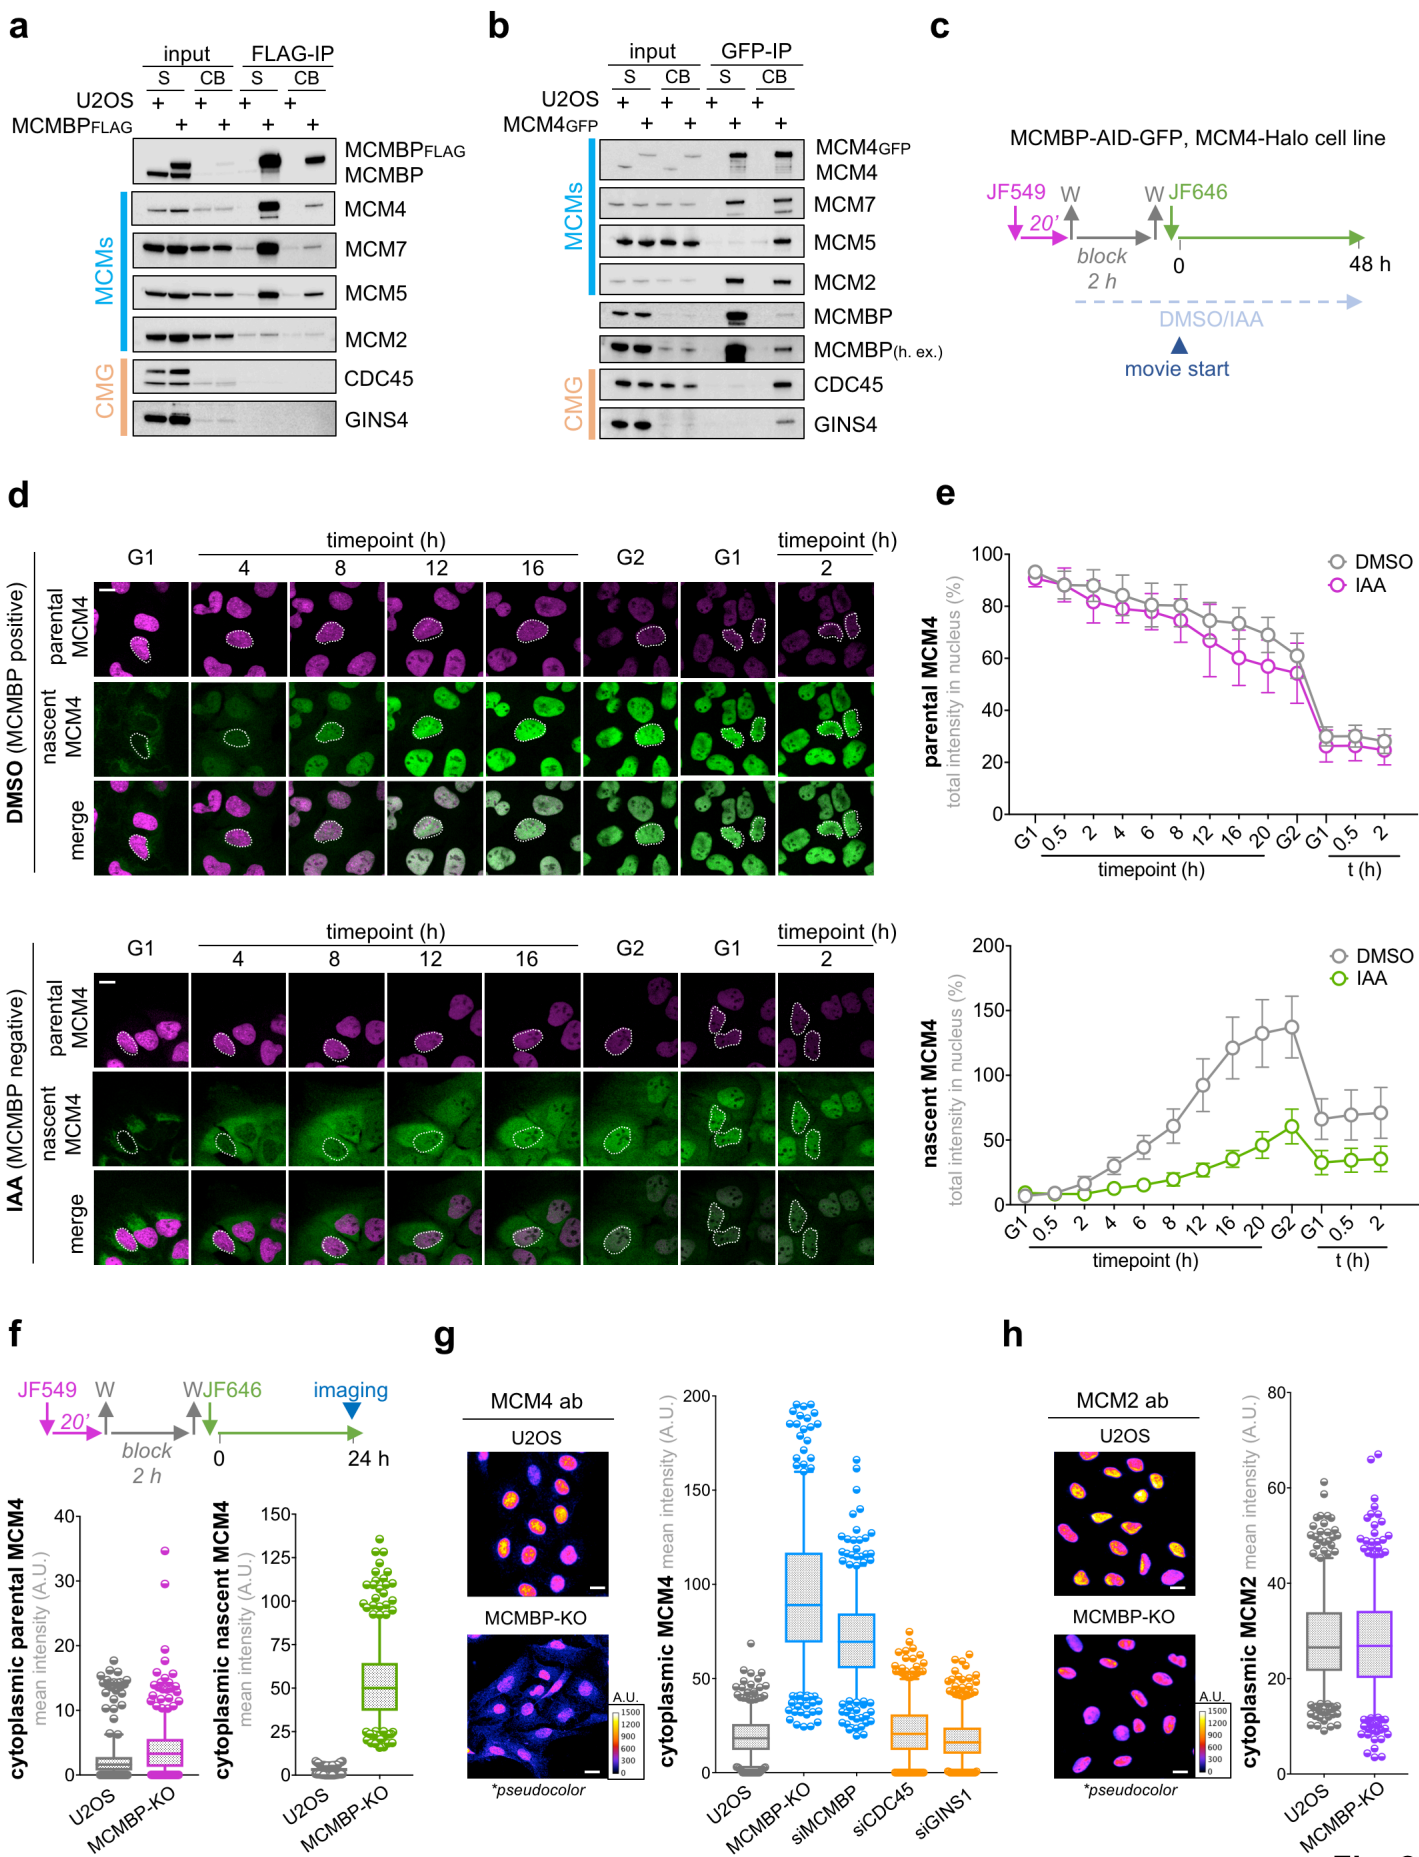

**Fig. 2**



**Fig. 2 | MCMBP stabilizes and translocates nascent MCM3-7 to cell nuclei.** **a**, FLAG-immunoprecipitation (FLAG-IP) followed by western blotting of sub-cellular fractions from U2OS cells or its derivative stably expressing FLAG-tagged MCMBP S: supernatant, CB: chromatin bound. **b**, GFP-immunoprecipitation (GFP-IP) followed by western blotting of sub-cellular fractions from U2OS cells or its derivative endogenously expressing GFP-tagged MCM4. **c**, MCM4-Halo dual labeling protocol in U2OS cells endogenously expressing MCM4-Halo and MCMBP-GFP-degron. **d**, Representative SPP images of U2OS cells endogenously expressing MCM4-Halo and MCMBP-GFP-degron in the presence of DMSO (top) or auxin (IAA; bottom) with a dual labeling of parental (magenta)/nascent (green) MCM4-Halo in an individual cell (dotted circle) at indicated timepoints. Scale bar, 14  $\mu$ m. See methods for information regarding cell cycle classification (G1 and G2). **e**, Quantification of total intensity of MCM4-Halo derived from the data in (**d**). Total intensity of parental (top) and nascent (bottom) of MCM4 at the start of time-lapse microscopy was pooled as 100 percent and represented as relative percentage for cells treated by DMSO or IAA. Each data point indicates mean  $\pm$ SD. n = 15 cells. **f**, Top, dual-HaloTag labeling protocol in U2OS (MCM4-Halo) and MCMBP-KO (MCM4-Halo) cells. Blue triangle represents collection of cells for QIBC analysis. Bottom, mean fluorescence intensity (MFI) of cytoplasmic parental MCM4 (left) and nascent MCM4 (right) for indicated cells. The center line of the plot represents the median. The boxes indicate the 25th and 75th centiles, and the whiskers indicate 5 and 95 percent values. n = 500 per condition. **g**, Left, representative images of immunostained MCM4 in naïve U2OS and MCMBP-KO cells without pre-extraction. The color gradient indicates the mean MCM4 intensity. Scale bar, 20  $\mu$ m. Right, quantification of MFI of cytoplasmic MCM4. n = 500 per condition. **h**, Left, images of immunostained MCM2 in naïve U2OS and MCMBP-KO cells without pre-extraction. The color gradient indicates the mean MCM2 intensity. Scale bar, 20  $\mu$ m. Right, Quantification of MFI of cytoplasmic MCM2. n = 500 per condition.

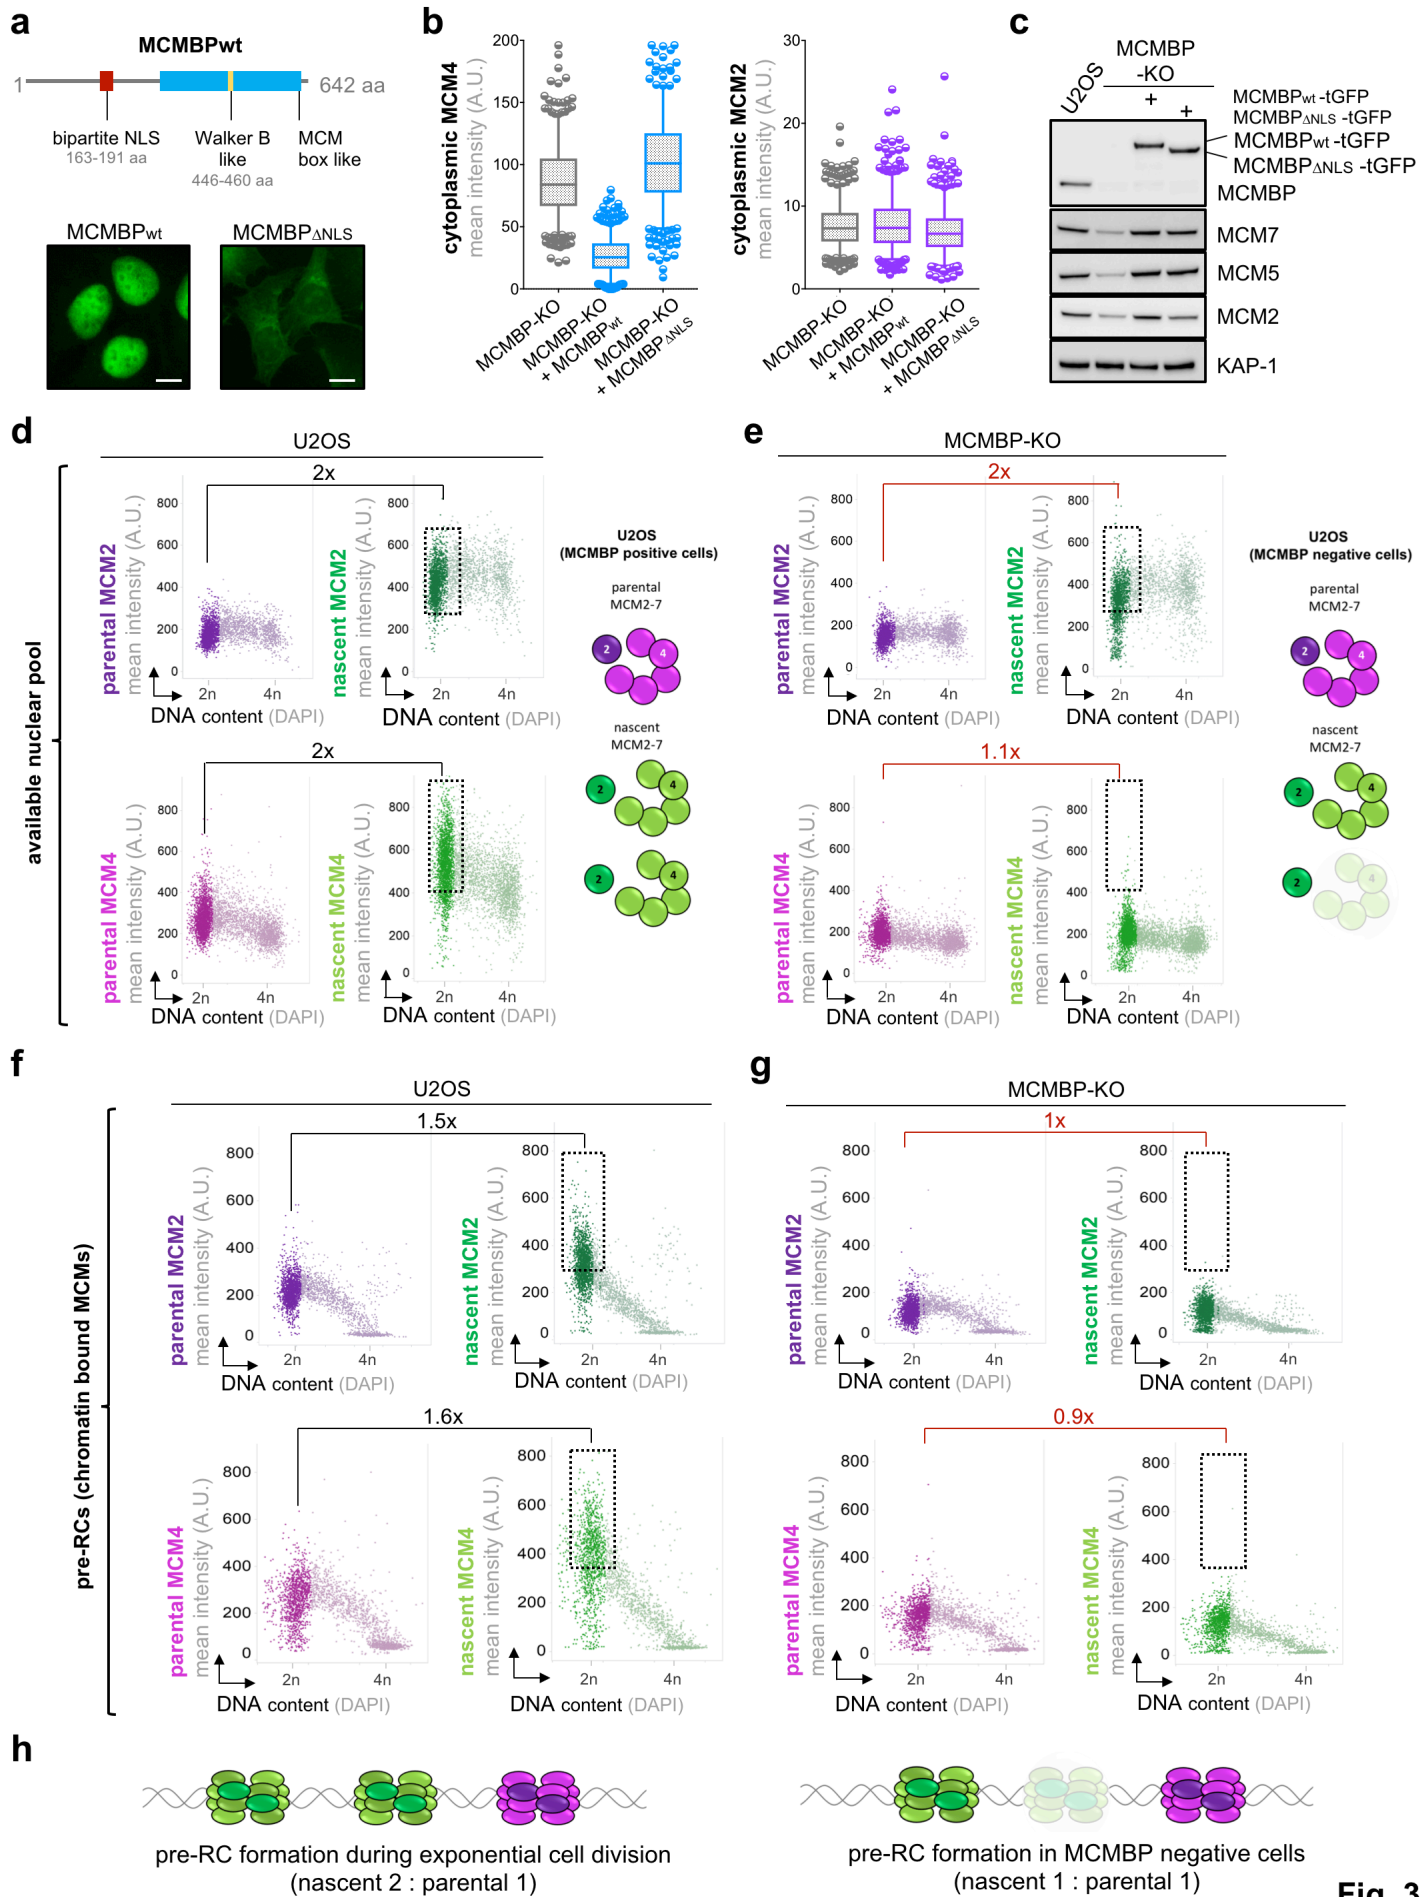

**Fig. 3**

### **Fig. 3 | Daughter cells license pre-RCs by distinct pools of parental and nascent MCM**

**subunits. a**, Top, human MCMBP protein domains. Bottom, representative images of stably integrated GFP-tagged wt- and NLS-deleted MCMBP in MCMBP-KO cells. Scale bar, 14  $\mu$ m. **b**, MFI of cytoplasmic MCM4 (right) and MCM2 (left). n = 500 per condition. The center line of the plot represents the median. The boxes indicate the 25th and 75th centiles, and the whiskers indicate 5 and 95 percent values. **c**, Western blotting of total cell extracts from naïve U2OS or MCMBP-KO cells complemented with either wt or NLS-deleted MCMBP. tGFP, turbo-GFP. **d**, Left, QIBC of naïve U2OS cells stained for parental (purple) or nascent (green) MCM2-Halo and DAPI (top), and parental (magenta) or nascent (green) MCM4-Halo and DAPI (bottom) without pre-extraction. Right, graphical summary of the inherited parental and nascent MCM pools in the naïve daughter cells. **e**, Left, QIBC of MCMBP-KO cells processed and analyzed as in (d). Right, graphical summary of the inherited parental and nascent MCM pools in MCMBP-KO daughter cells. Boxes in (d) and (e) mark the excess nascent MCM2 or MCM4 over the levels of parental MCM2 or MCM4 in G1/S phase. Data derived from Extended data Figs. 8b and 9b. **f**, Left, QIBC of naïve U2OS cells stained for chromatin bound parental (purple) or nascent (green) MCM2-Halo and DAPI (top) and chromatin bound parental (magenta) or nascent (green) MCM4-Halo and DAPI (bottom). **g**, Left, QIBC of MCMBP-KO cells processed and analyzed as in (f). Boxes in (f) and (g) mark the excess nascent MCM2 or MCM4 over the levels of parental MCM2 or MCM4 at G1/S phase. Data derived from Extended data Figs. 8c and 9c. **h**, Schematic outcome of pre-RC formation in naïve U2OS cells (left) and MCMBP-KO (right) with regard to distinct MCM2-7 complexes composed of nascent and parental subunits, respectively.

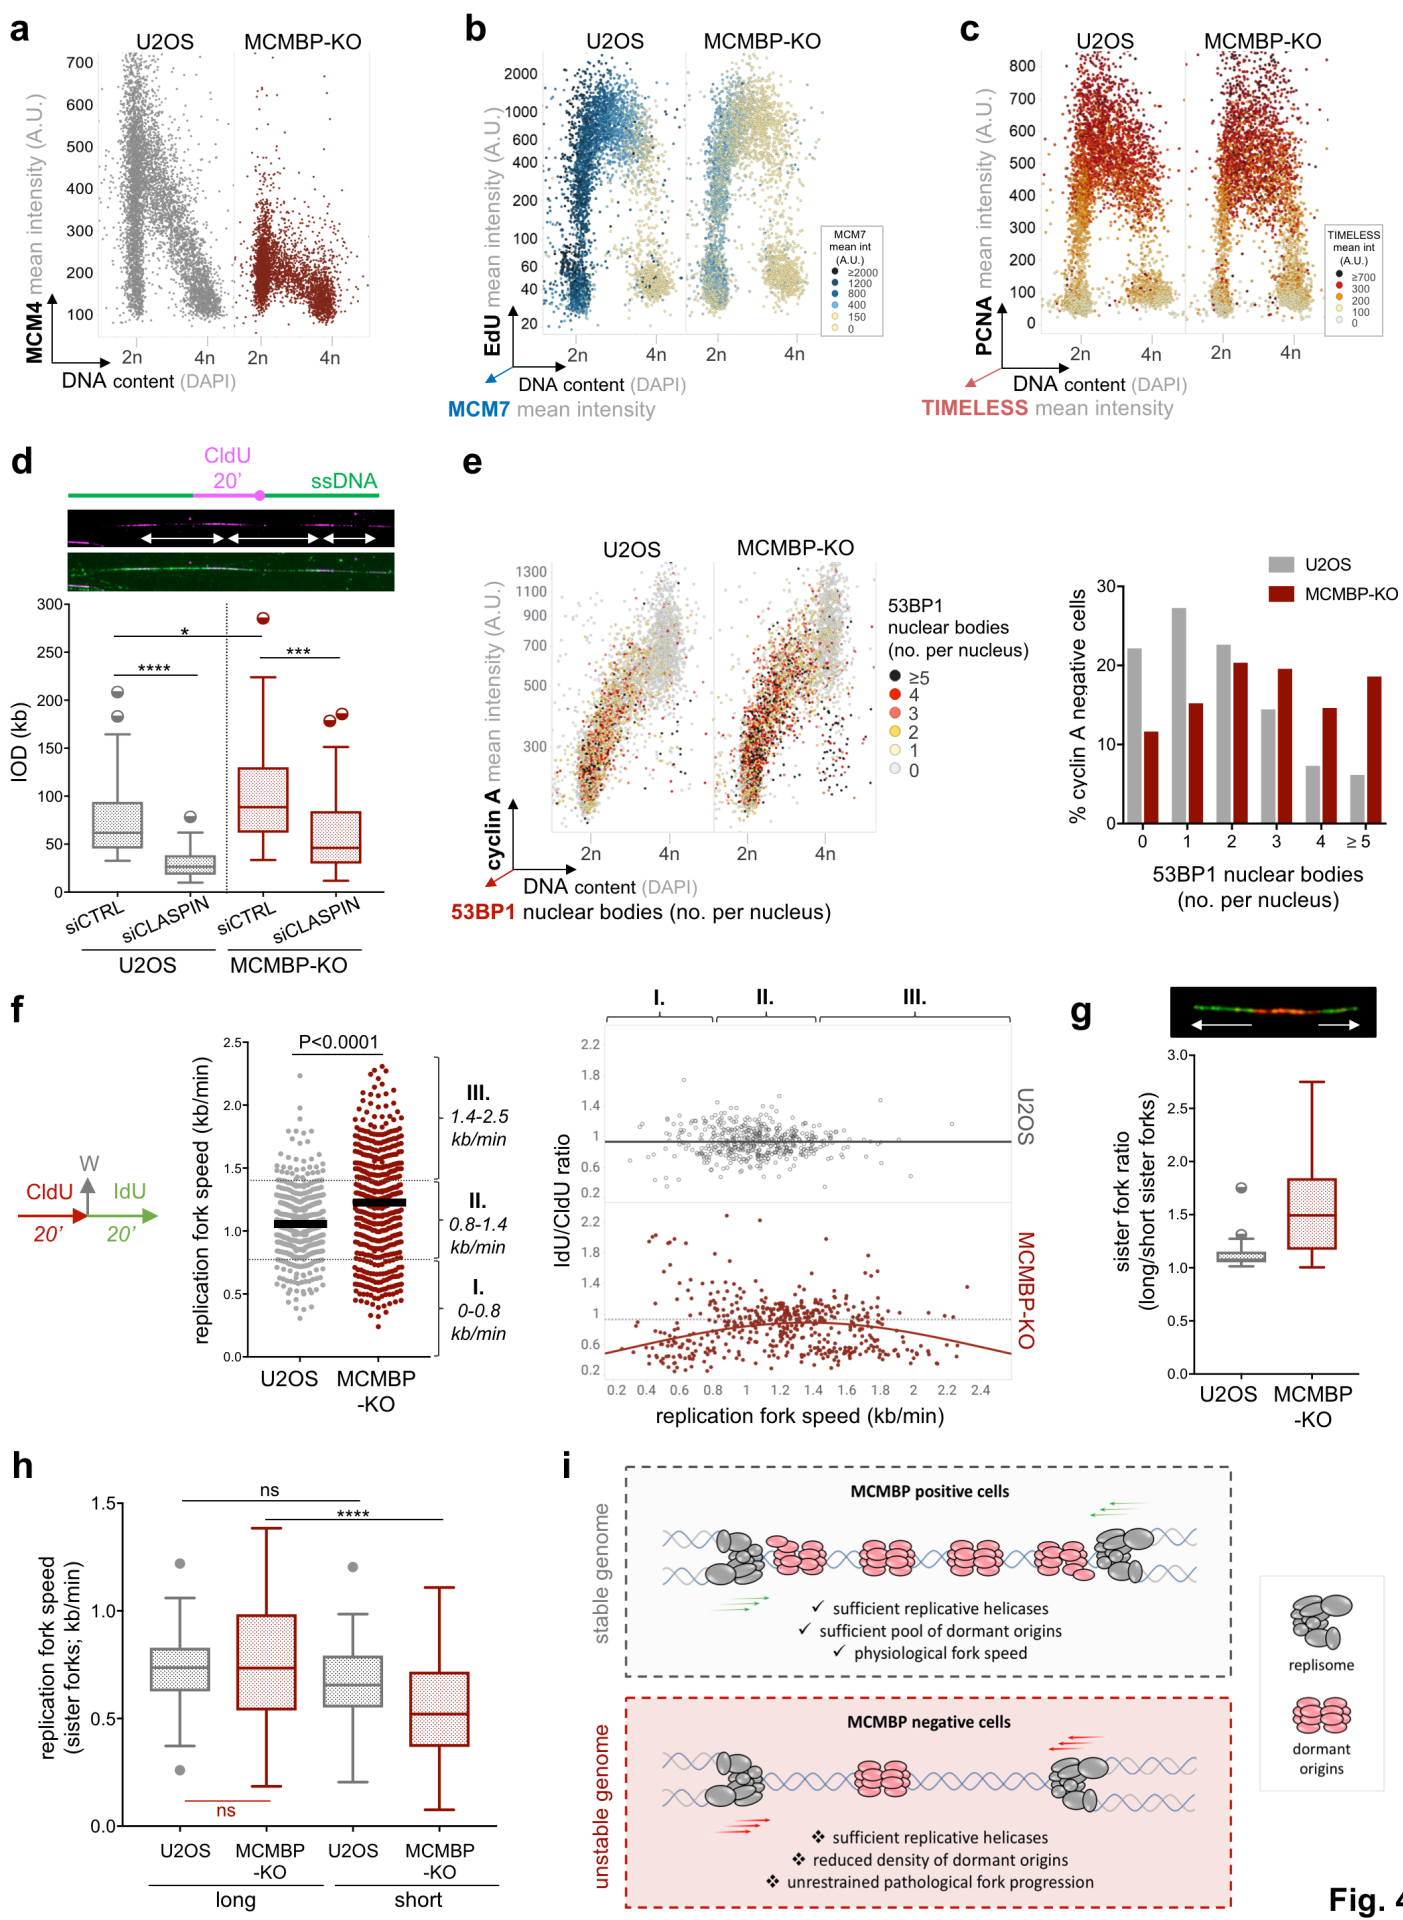

**Fig. 4**

**Fig. 4 | MCMBP loss restrains pre-RCs formation and induces replication stress. a**, QIBC of MCM4 chromatin loading in U2OS or MCMBP-KO cells as indicated.  $n \approx 3500$  cells per condition. **b**, QIBC of EdU incorporation in naïve or MCMBP-depleted U2OS stained for MCM7 and DAPI.  $n \approx 5000$  cells for each condition. The color gradient indicates the mean intensity of chromatin-loaded MCM7. **c**, QIBC of TIMELESS in U2OS or MCMBP-KO cells co-stained for PCNA and DAPI.  $n \approx 3500$  cells for each condition. The color gradient indicates the mean intensity of chromatin-bound TIMELESS. **d**, Top, DNA fiber labeling protocol to monitor inter-origin distance (IOD). ssDNA, single stranded DNA. Bottom, IOD in U2OS or MCMBP-KO cells treated with control or CLASPIN siRNAs. The central line of the box and whisker depict the median of Tukey plot. The boxes indicate the 25th and 75th percentiles.  $n = 60$  initiation events. (\*,  $P=0.0259$ ; \*\*\*,  $P=0.0007$ ; \*\*\*\*,  $P < 0.0001$ ; ns, not significant) **e**, Left, QIBC of 53BP1 nuclear bodies (NBs) in U2OS or MCMBP-KO cells co-stained for cyclin A and DAPI to discriminate cell cycle phases ( $n \approx 5700$  cells for each condition; colors indicate the number of 53BP1 nuclear bodies per nucleus). Right, Quantification of 53BP1 NBs in the depicted cell populations. **f**, Left, DNA fiber labeling protocol. Middle, replication fork speed in cells as indicated. The line represents median.  $n = 500$  fibers. Right, individual fork ratio is derived from the data in (left) by dividing the length of DNA tracts labeled by IdU and CldU, respectively. The grey (U2OS) and red (MCMBP-KO cells) lines represent Gaussian fitting. **g**, Top, a representative example of asymmetrical bi-directional fork. Bottom, quantification of sister fork ratio from 50 bidirectional forks for each condition. **h**, Fork speed derived from the long and short sisters of bidirectional replication forks (from data in Fig 4g). (\*\*\*\*,  $P < 0.0001$ ; ns, not significant) **i**, A model depicting the critical role of MCM surplus to support optimal levels of replicative helicases, dormant origins, and physiological fork speed across multiple ensuing cell divisions.



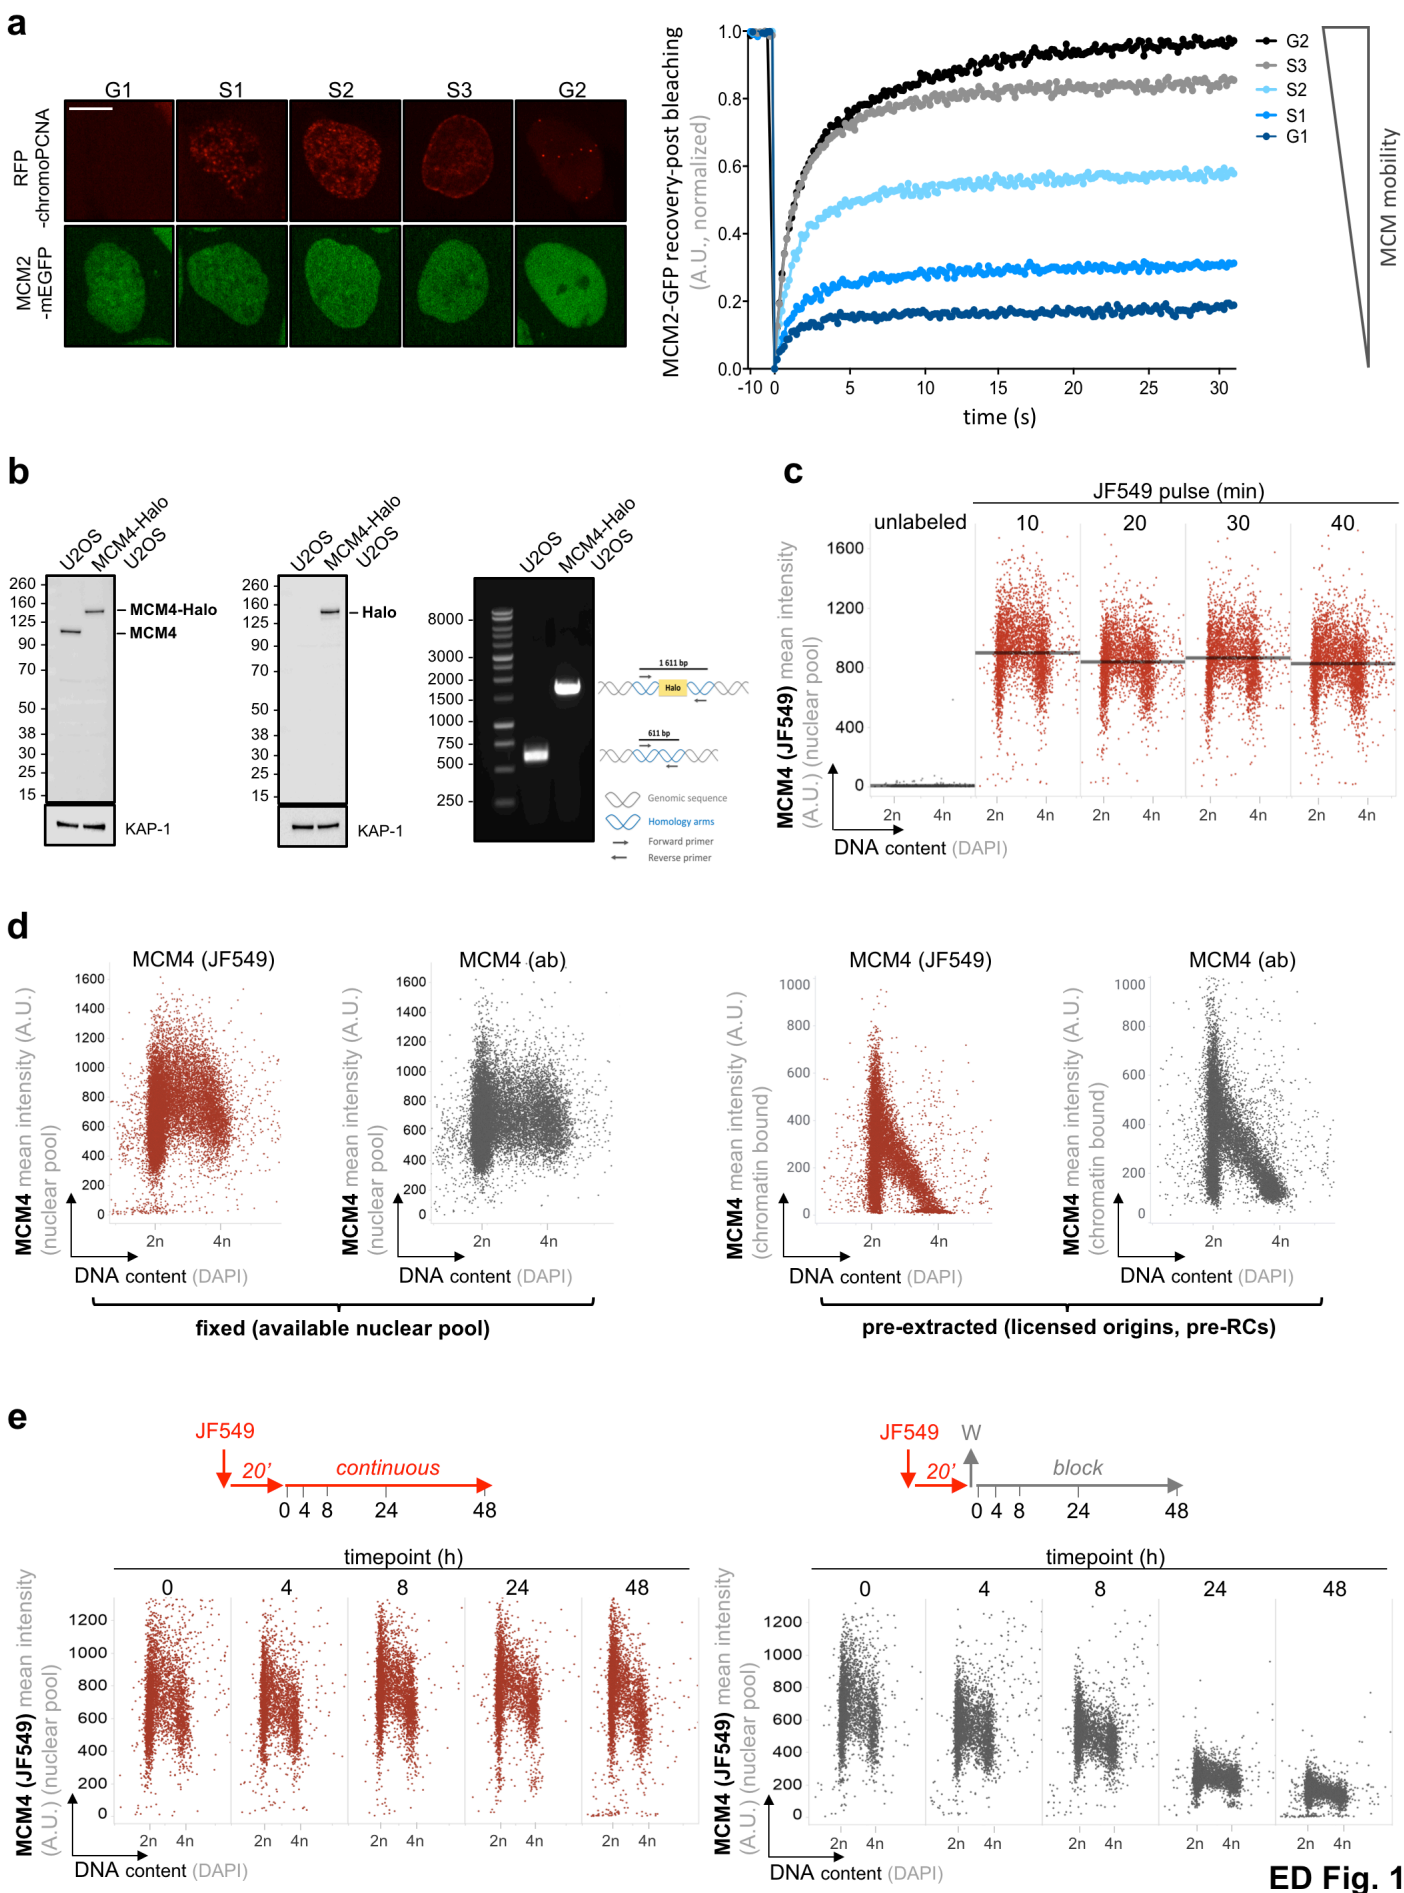

ED Fig. 1

## Extended Data Fig. 1 | Development of tools and characterization of endogenous MCM

**proteins. a**, Left, representative images of U2OS cells with endogenously GFP-tagged MCM2 and ectopically expressing RFP-chromoPCNA at indicated cell cycle stages used for FRAP analysis. Scale bar, 14  $\mu$ m. Right, a summary of the MCM2-GFP FRAP curves at indicated cell cycle stages.  $n = 14$  per cell cycle stage. **b**, Left, U2OS whole-cell lysates with endogenously tagged MCM4-Halo immunoblotted with MCM4 antibody. Middle, U2OS whole-cell lysates with endogenously tagged MCM4-Halo immunoblotted with Halo antibody. KAP-1 was used as loading control. Right, junction PCR showing homozygous MCM4-Halo tagging. **c**, QIBC of MCM4-Halo cells pulsed with JF549 HaloTag ligand (200 nM) for indicated time points. Nuclear DNA was counterstained by 4',6-diamidino-2-phenylindole (DAPI). The line represents median.  $n \approx 3500$  cells per condition. A.U., arbitrary units. **d**, Left, QIBC of MCM4-Halo cells pulsed with JF549 HaloTag ligand (200 nM) for 20 min and immunostained for MCM4 without pre-extraction before fixation. Nuclear DNA was counterstained by DAPI.  $n \approx 16000$  cells per condition. Right, QIBC of MCM4-Halo cells pulsed with JF549 HaloTag ligand (200 nM) for 20 min and immunostained for MCM4 and DAPI with pre-extraction before fixation.  $n \approx 12000$  cells per condition. **e**, Left, HaloTag labeling protocol in MCM4-Halo cells. QIBC quantification of MCM4-Halo cells continuously labeled with 200 nM JF549 HaloTag ligand at indicated timepoints. Right, HaloTag labeling protocol in MCM4-Halo cells. QIBC-based quantification of MCM4-Halo cells pulsed with 200 nM JF549 HaloTag ligand followed by addition of 100  $\mu$ M non-fluorescent blocking ligand for indicated timepoints.  $n \approx 3500$  cells per condition.



**a**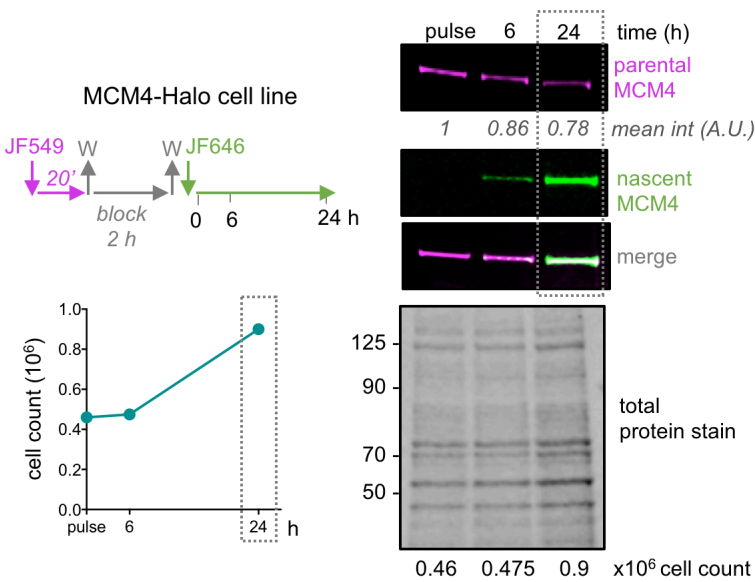**b**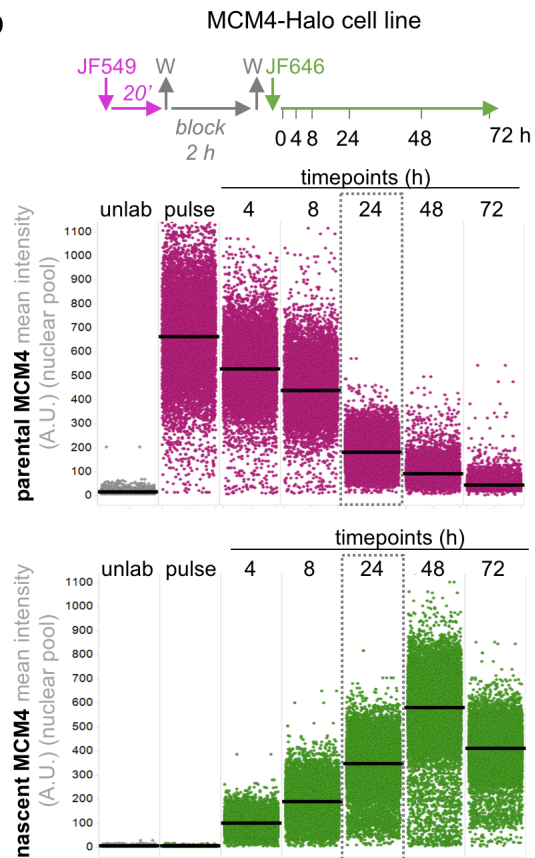**c**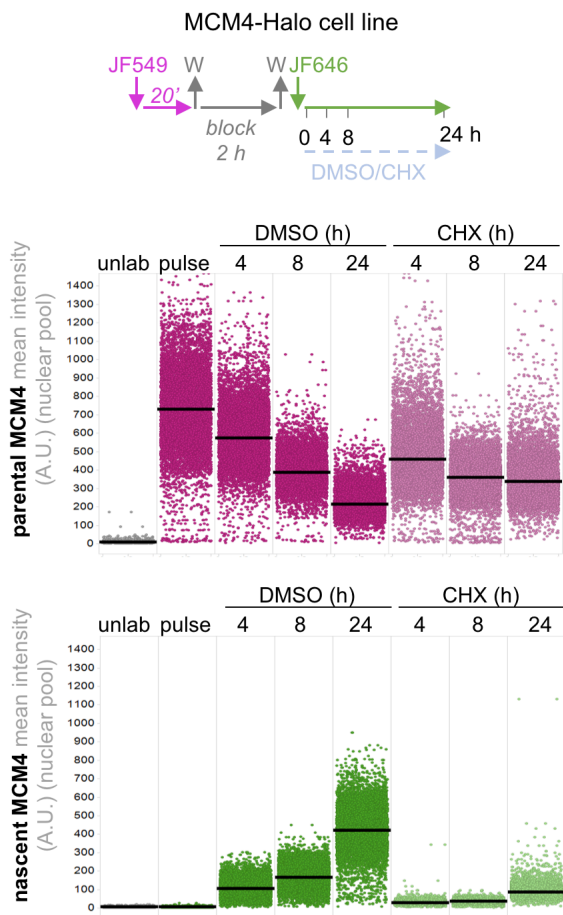**d**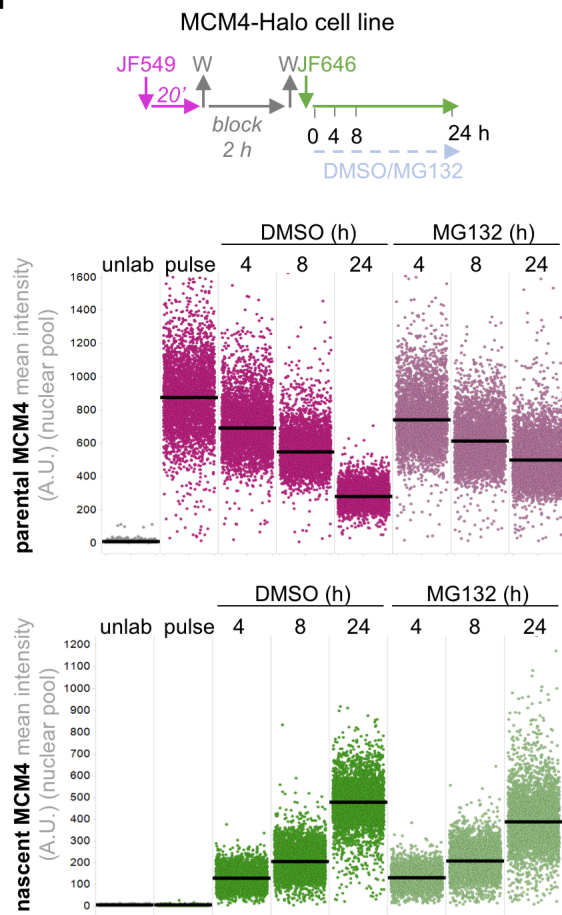

**Extended Data Fig. 2 | Newly synthesized MCMs constantly replenish the declining pool of recycled parental MCMs.** **a**, Left (top), dual-HaloTag labeling protocol in MCM4-Halo cells. Left (bottom), cell count for indicated timepoints. Right, SDS-PAGE of whole cell lysates of MCM4-Halo cells labeled for nascent and parental MCM4 at indicated timepoints (with indicated cell count). Total protein stain as loading control. Box marks the cell doubling time. **b**, Top, dual-HaloTag labeling protocol in MCM4-Halo cells. Middle, QIBC of MCM4-Halo cells immunostained for parental (magenta) MCM4 without pre-extraction before fixation. Bottom, QIBC of MCM4-Halo cells stained for nascent (green) MCM4 without pre-extraction before fixation. Boxes indicate the cell doubling time, horizontal lines are medians.  $n \approx 10000$  cells per condition. **c**, Top, dual-HaloTag labeling protocol in MCM4-Halo cells treated as indicated with cycloheximide (CHX; 12.5  $\mu\text{g}/\text{ml}$ ). Middle, QIBC of MCM4-Halo cells immunostained for parental (magenta) MCM4 without pre-extraction before fixation at indicated timepoints after the indicated treatments. Bottom, QIBC of MCM4-Halo cells stained for nascent (green) MCM4 without pre-extraction before fixation at indicated timepoints after indicated treatments. Horizontal lines are medians.  $n \approx 9000$  cells per condition. **d**, Top, dual-HaloTag labeling protocol in MCM4-Halo cells treated as indicated with MG132 (2  $\mu\text{M}$ ). Middle, QIBC of MCM4-Halo cells immunostained for parental MCM4 (magenta) without pre-extraction before fixation after indicated treatments. Bottom, QIBC of MCM4-Halo cells stained for nascent MCM4 (green) without pre-extraction before fixation at indicated timepoints after indicated treatments. Horizontal lines are medians.  $n \approx 3500$  cells per condition.

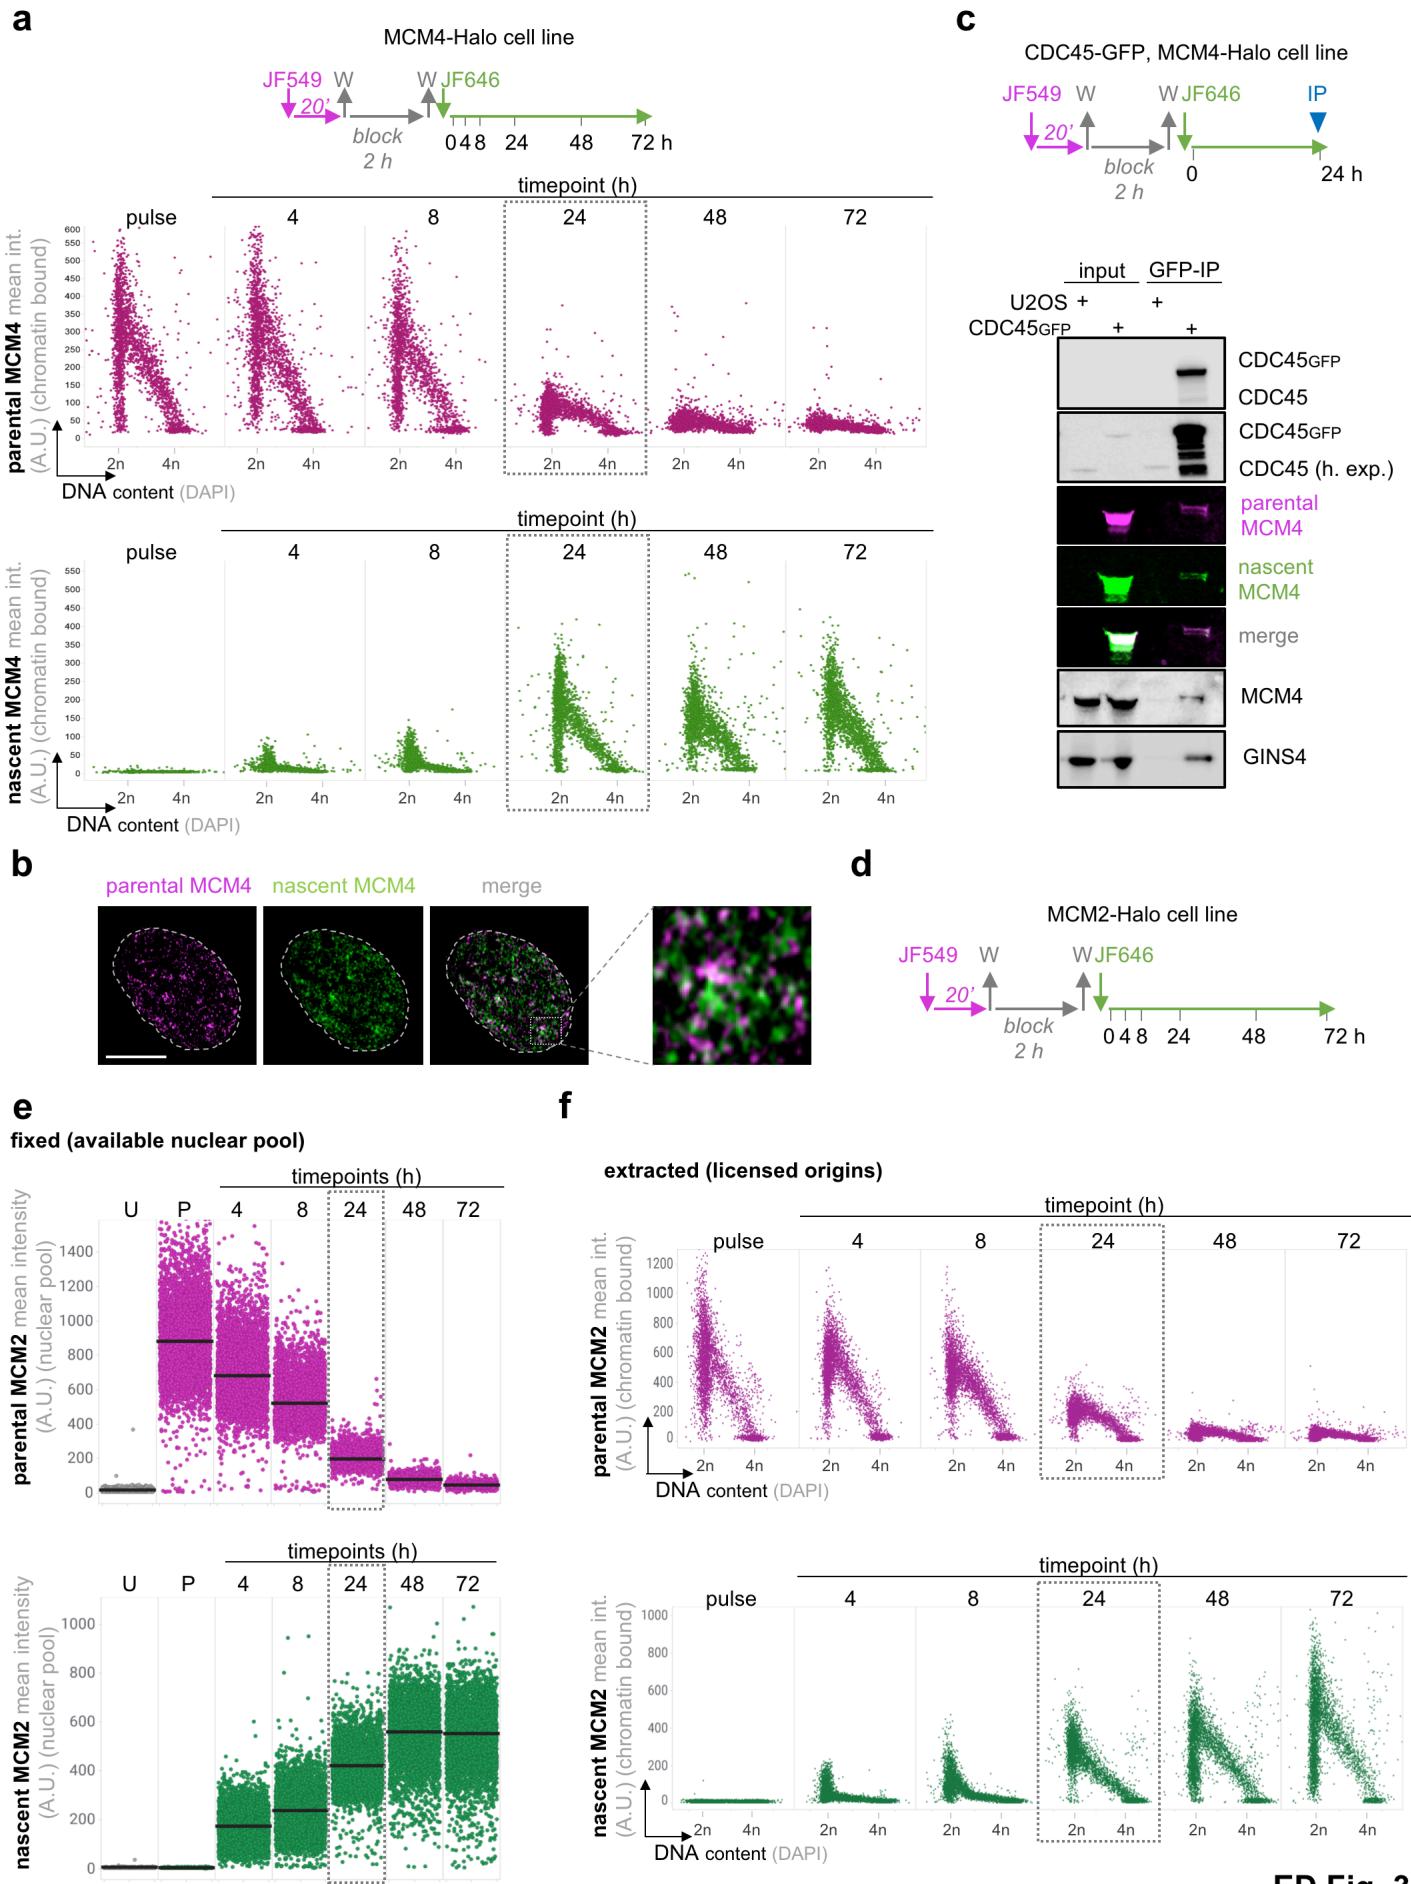

**Extended Data Fig. 3 | Nascent and parental MCMs are equally proficient in pre-RC licensing and CMG formation.** **a**, Top, dual-HaloTag labeling protocol in MCM4-Halo cells. Middle, QIBC of MCM4-Halo cells immunostained for parental MCM4 (magenta) with pre-extraction before fixation. Bottom, QIBC of MCM4-Halo cells stained for nascent MCM4 (green) with pre-extraction before fixation. Boxes mark the cell doubling time.  $n \approx 2000$  cells per condition. **b**, Representative confocal images of chromatin-bound parental (magenta) and nascent (green) MCM4 inherited by a daughter cell. Scale bar, 14  $\mu\text{m}$ . **c**, Top, dual-HaloTag labeling protocol in MCM4-Halo cells with endogenously GFP-tagged CDC45. Blue triangle represents collection of lysates for immunoprecipitation (IP). Bottom, GFP-IP of whole cell lysates immunostained before collection for nascent- and parental-MCM4 and then immunoblotted for indicated proteins. **d**, Dual-HaloTag labeling protocol in MCM2-Halo cells. **e**, QIBC of MCM2-Halo cells immunostained for parental MCM2 (magenta) without pre-extraction before fixation. Bottom, QIBC of MCM2-Halo cells immunostained for nascent MCM2 (green) without pre-extraction before fixation. Staining of parental and nascent MCM2 was performed according labeling protocol in (d). Boxes mark the cell doubling time. Horizontal lines are medians.  $n \approx 4400$  cells per condition. **f**, Top, QIBC of MCM2-Halo cells immunostained for parental MCM2 (magenta) with pre-extraction before fixation. Bottom, QIBC of MCM2-Halo cells immunostained for nascent MCM2 (green) with pre-extraction before fixation. Box marks the cell doubling time.  $n \approx 3000$  cells per condition.

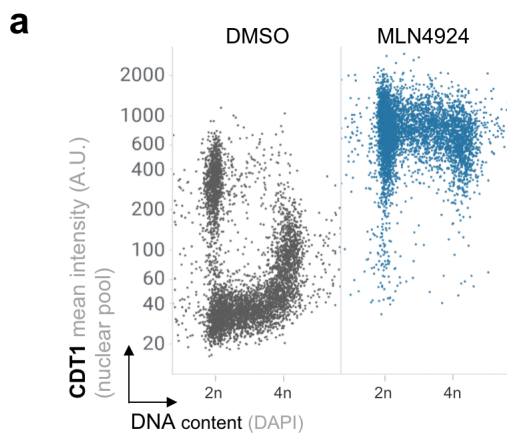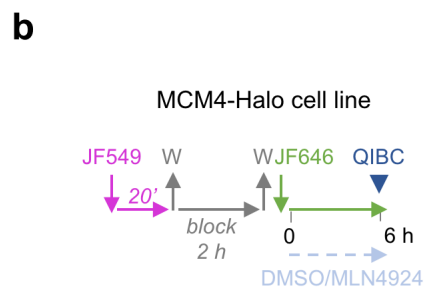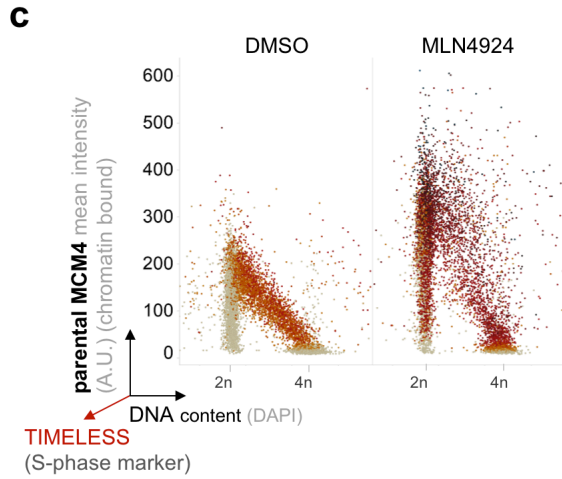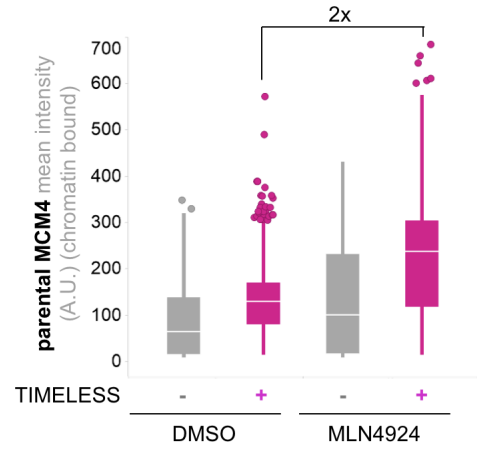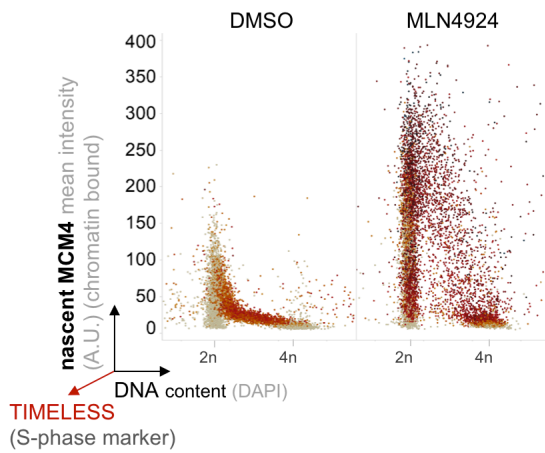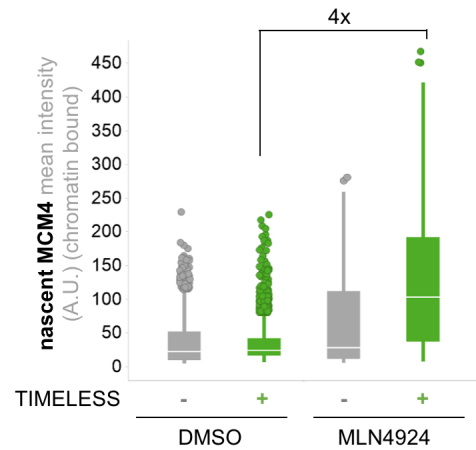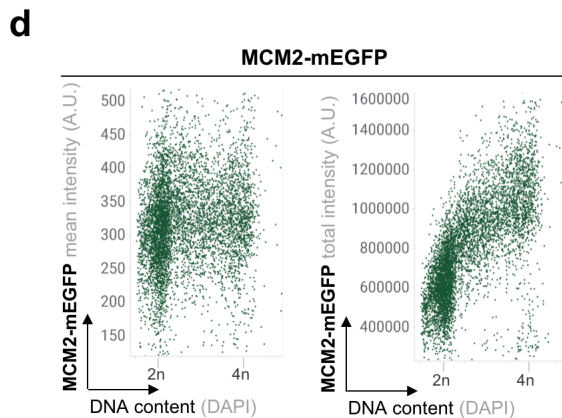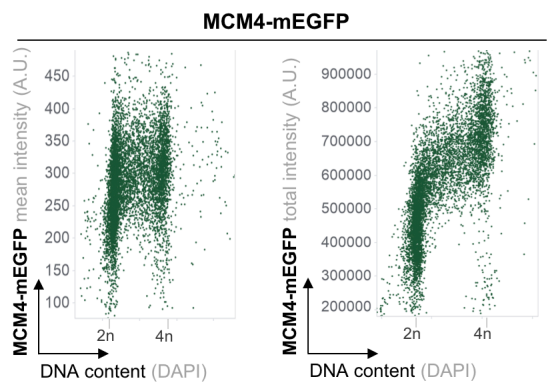



**Extended Data Fig. 4 | Both nascent and parental MCMs are maintained in licensing-competent mode before cell division. a**, QIBC of MCM4-Halo cells immunostained for CDT1 and counterstained for DAPI after treatment with DMSO (negative control) or MLN4924 (5  $\mu$ M; 6 h) without pre-extraction before fixation.  $n \approx 5300$  cells per condition. **b**, Dual-HaloTag labeling protocol in MCM4-Halo cells with indicated DMSO or MLN4924 treatments. Blue triangle indicates collection of cells for QIBC. **c**, Top (left), QIBC of MCM4-Halo cells with JF549-labeled parental MCM4 immunostained for TIMELESS (red) and counterstained for DAPI after indicated treatments with pre-extraction before fixation. Top (right), quantification of parental MCM4 fluorescence intensity in TIMELESS-positive or -negative cells after indicated treatments. The center lines in the plots are medians. Bottom (left), QIBC of MCM4-Halo cells with JF646-labeled nascent MCM4, immunostained for TIMELESS and counterstained for DAPI after indicated treatments with pre-extraction before fixation. Bottom (right), quantification of nascent MCM4 in cells TIMELESS-positive or -negative cells after indicated treatments. The center lines in the plots are medians.  $n \approx 7400$  cells per condition. **d**, Left, QIBC of cells with endogenously GFP-tagged MCM2 stained with DAPI without pre-extraction before fixation.  $n \approx 8300$  cells per condition. Right, QIBC of cells with endogenously GFP-tagged MCM4 stained with DAPI without pre-extraction before fixation.  $n \approx 8300$  cells per condition.

**a**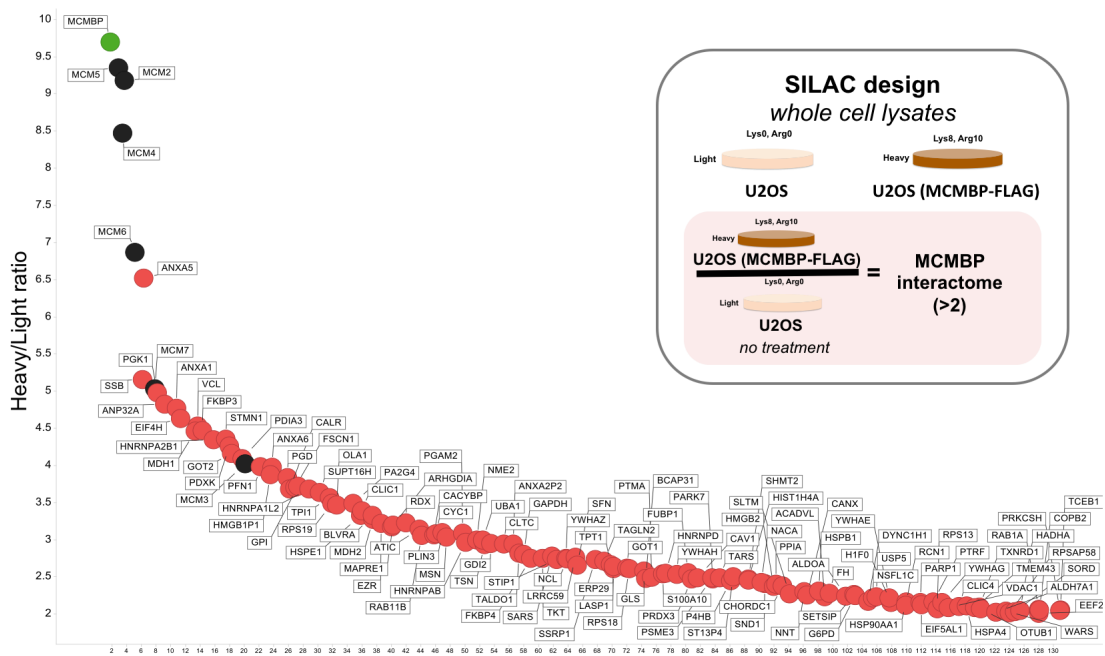**b**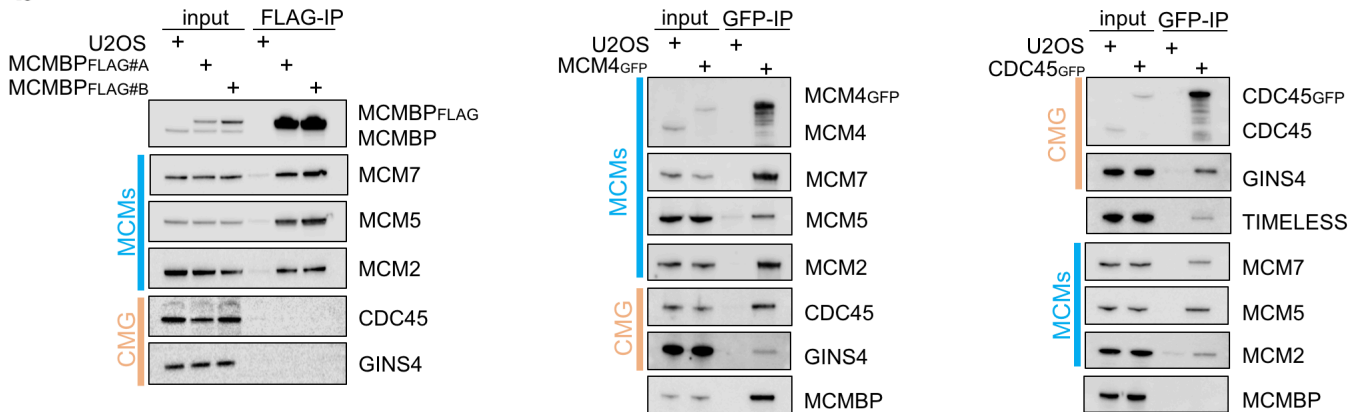**c**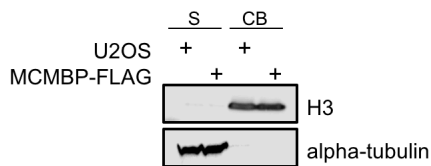**d**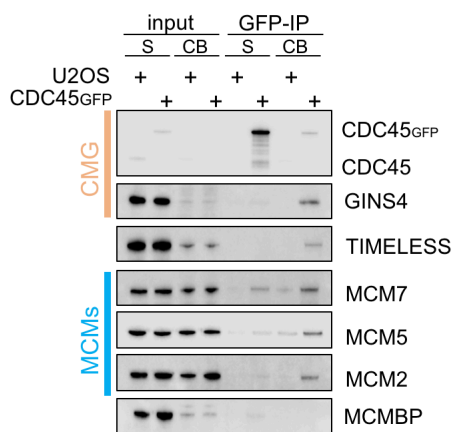**e**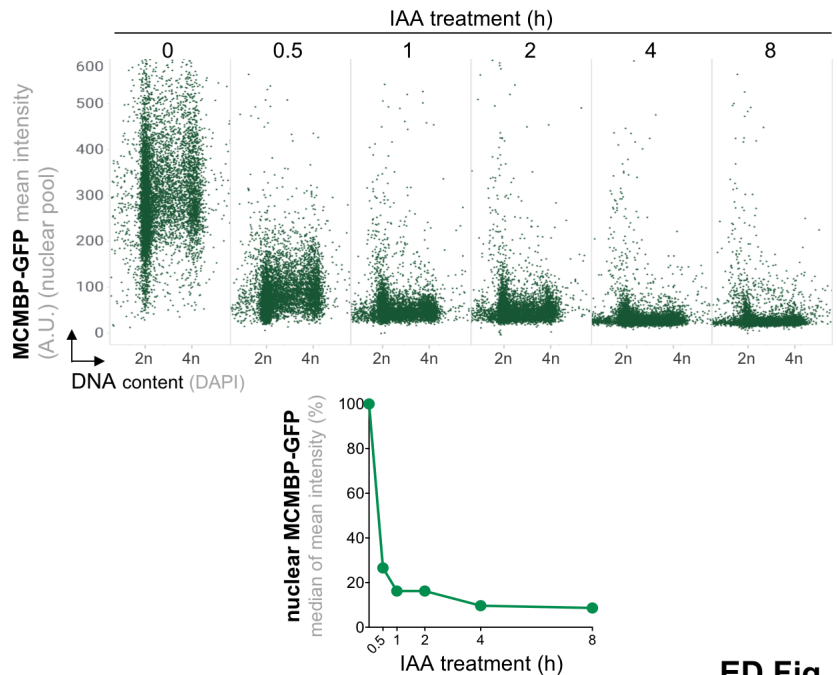



**Extended Data Fig. 5 | MCMBP associates with CMG helicase independent pool of MCMs. a,**

Interactome of MCMBP obtained upon FLAG-immunoprecipitation (FLAG-IP) from U2OS cells or its derivative ectopically expressing FLAG-tagged MCMBP. FLAG-IP was whole cell extracts (using RIPA lysis buffer with 150 mM NaCl) was analyzed by mass spectrometry. Inset represents SILAC design and criteria for analysis of MCMBP interactome. **b,** Left, FLAG-IP followed by immunoblotting of whole cell extract from U2OS cells or its derivative ectopically expressing FLAG-tagged MCMBP. Middle, GFP-immunoprecipitation (GFP-IP) followed by immunoblotting of whole cell extract from U2OS cells or its derivative endogenously expressing GFP-tagged MCM4. Right, GFP-immunoprecipitation (GFP-IP) followed by immunoblotting of whole cell extract from U2OS cells or its derivative endogenously expressing GFP-tagged CDC45. **c,** Sub-cellular fraction (500 mM NaCl) from U2OS cells or its derivative stably expressing FLAG-tagged MCMBP followed by immunoblotting of H3 or alpha-tubulin. S: supernatant, CB: chromatin-bound. **d,** GFP-IP followed by immunoblotting of sub-cellular fractions (500 mM NaCl) from U2OS cells or its derivative endogenously expressing GFP-tagged MCM4. **e,** Top, QIBC of cells with endogenously GFP-AID-tagged MCMBP stained with DAPI without pre-extraction before fixation at indicated timepoints after auxin (IAA; 0.5 mM) treatment.  $n \approx 6000$  cells per condition. Bottom, line plot derived from QIBC results on the top.

**a** MCMBP-AID-GFP, MCM4-Halo cell line

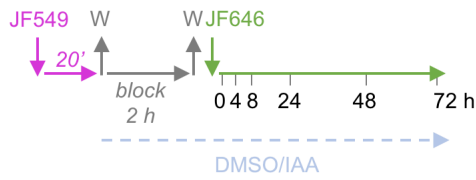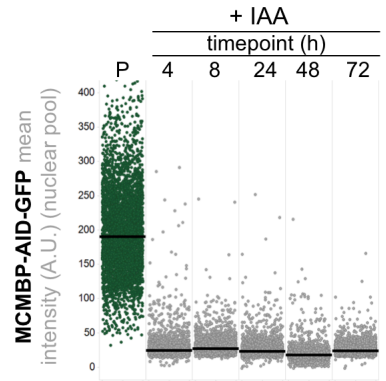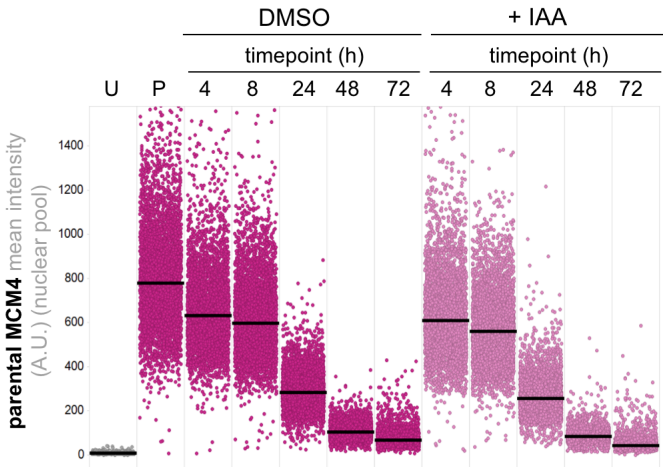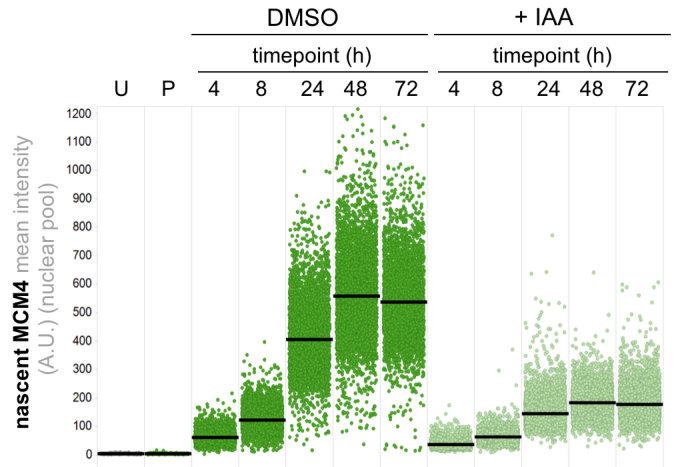

**b**

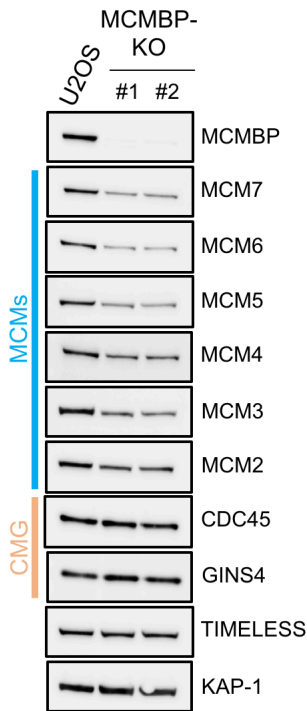

**c**

MCM4-Halo, GFP-PCNA cell line  
MCMBP-KO, MCM4-Halo, GFP-PCNA cell line

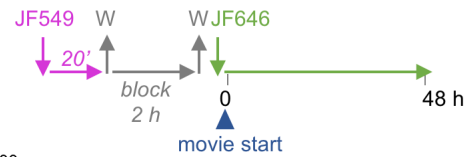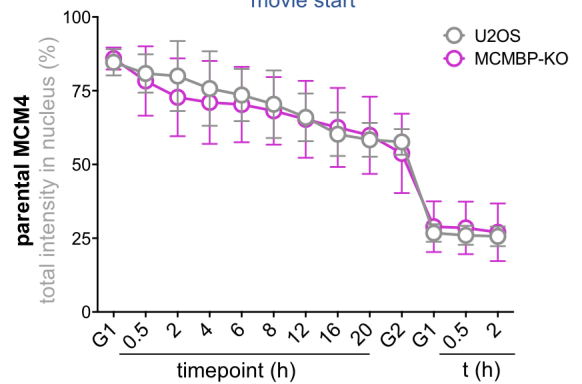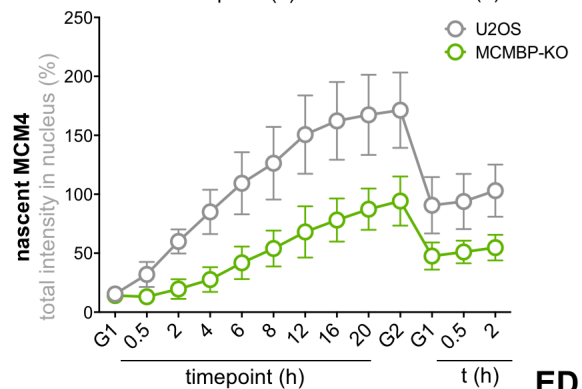

**Extended Data Fig. 6 | MCMBP fosters nuclear accumulation of nascent but not parental**

**MCMs. a,** Top (left), dual-HaloTag labeling protocol in MCMBP-AID-GFP cells with endogenously Halo-tagged MCM4 with specified IAA treatment (0.5 mM). Top (right), QIBC of cells MCMBP-AID-GFP cells with endogenously Halo-tagged MCM4 stained with DAPI without pre-extraction before fixation at indicated timepoints after IAA treatment. Bottom (left), QIBC of MCM4-Halo cells stained for parental MCM4 (magenta) without pre-extraction before fixation after indicated treatments. Bottom (right), QIBC of MCM4-Halo cells stained for nascent MCM4 (green) without pre-extraction before fixation after indicated treatments. Horizontal lines medians. U: unlabeled cells, P: pulse.  $n \approx 4000$  cells per condition. **b,** Whole-cell extracts from U2OS and MCMBP-KO cells (two independent clones #1 and #2) immunoblotted with indicated antibodies. KAP-1 was used as loading control. **c,** Top, dual-HaloTag labeling protocol as in Fig1c. Total intensities of parental (middle) and nascent (bottom) MCM4 at the start of time-lapse microscopy were considered as 100 percent and the data display relative values for U2OS (MCM4-Halo) and MCMBP-KO (MCM4-Halo) cells. Each data point indicates mean  $\pm$ SD.  $n = 15$  cells.

**a**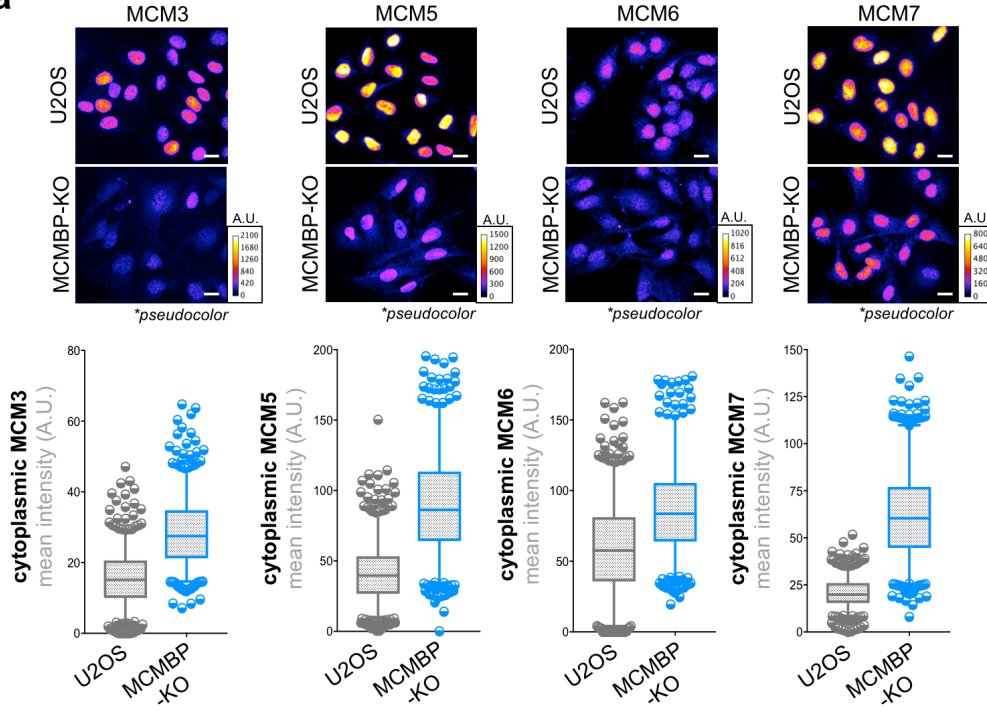**b**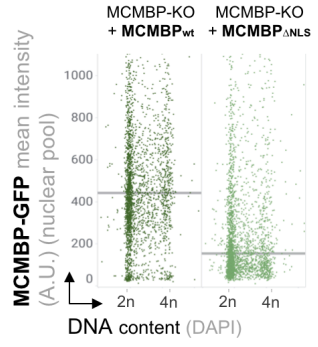**c**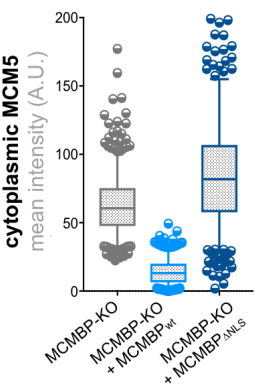**e**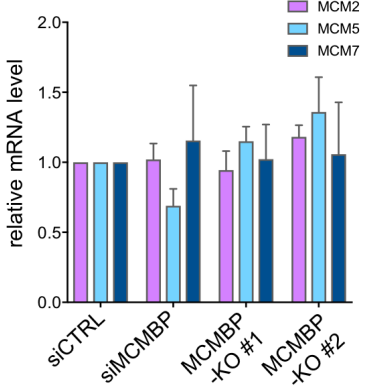**f**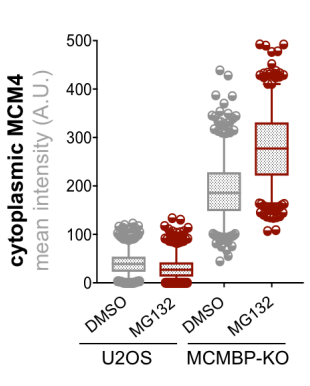**d**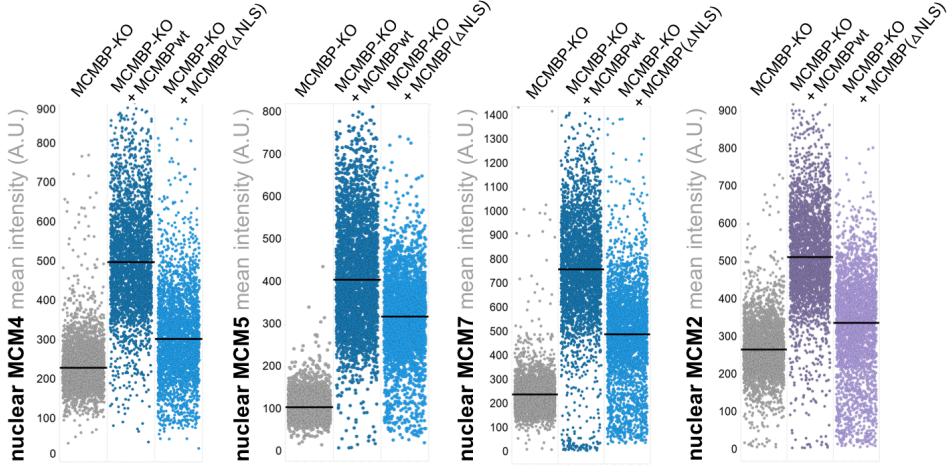**g**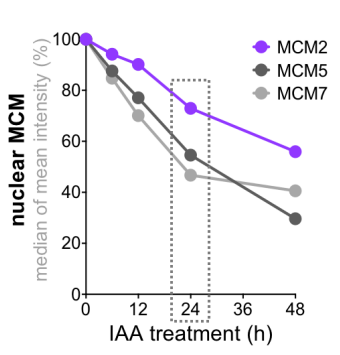

**Extended Data Fig. 7 | MCMBP possesses an autonomous NLS motif that regulates the rapid nucleo-cytoplasmic shuttling of MCM3-7** **a**, Top, representative images of immunostained MCMs in naïve U2OS and MCMBP-KO cells without pre-extraction before fixation. The color gradient indicates the mean MCM intensity. Scale bar, 20  $\mu$ m. Bottom, quantification of mean fluorescence intensity (MFI) of cytoplasmic MCMs. The center lines in the plots are medians. The boxes indicate the 25th and 75th centiles, and the whiskers indicate 5 and 95 percent values. **b**, QIBC of MCMBP-KO cells ectopically expressing MCMBP<sub>wt</sub>-GFP or MCMBP <sub>$\Delta$ NLS</sub>-GFP stained with DAPI without pre-extraction before fixation. The line represents median.  $n \approx 2700$  per condition. **c**, MFI of cytoplasmic MCM5 (left) and MCM7 (right).  $n = 500$  per condition. **d**, QIBC of MCMBP-KO cells or MCMBP-KO cells ectopically expressing MCMBP<sub>wt</sub>-GFP or MCMBP <sub>$\Delta$ NLS</sub>-GFP stained for indicated MCMs without pre-extraction before fixation. The center lines in the plots represent the median.  $n \approx 2800$  per condition. **e**, RT-PCR analysis of mRNA level for MCM2, MCM5 and MCM7 for indicated cells. mRNA level in control cells was normalized as 100 percent. Data represents mean  $\pm$  SD from 3 technical replicates. **f**, MFI of cytoplasmic MCM4 for indicated cells treated with DMSO or MG132 (2  $\mu$ M; 6 h) as indicated. **g**, MFI of nuclear MCM2, MCM5 and MCM7 after treating MCMBP-degron cells with IAA (0.5 mM) for indicated timepoints. Each timepoint displays median of mean intensity of nuclear MCM derived from  $\approx 5000$  cells. Box marks the cell doubling time.

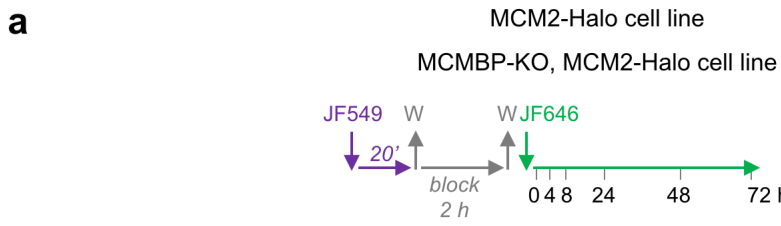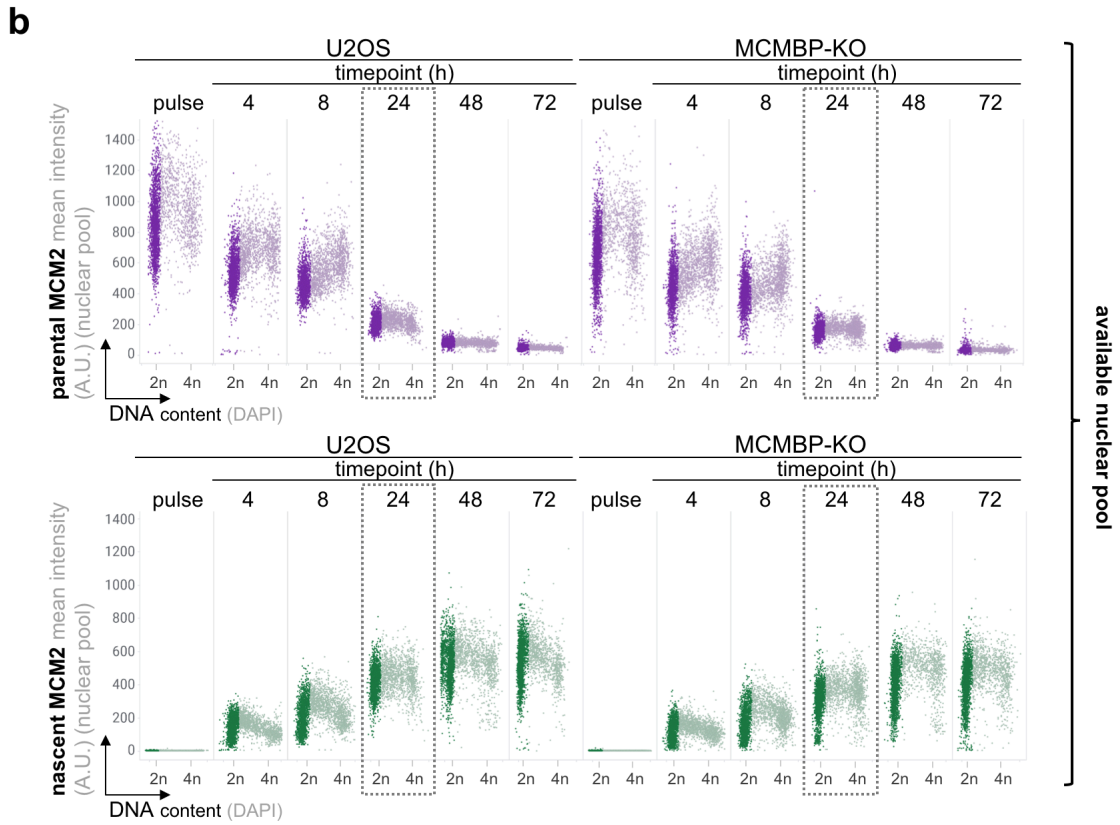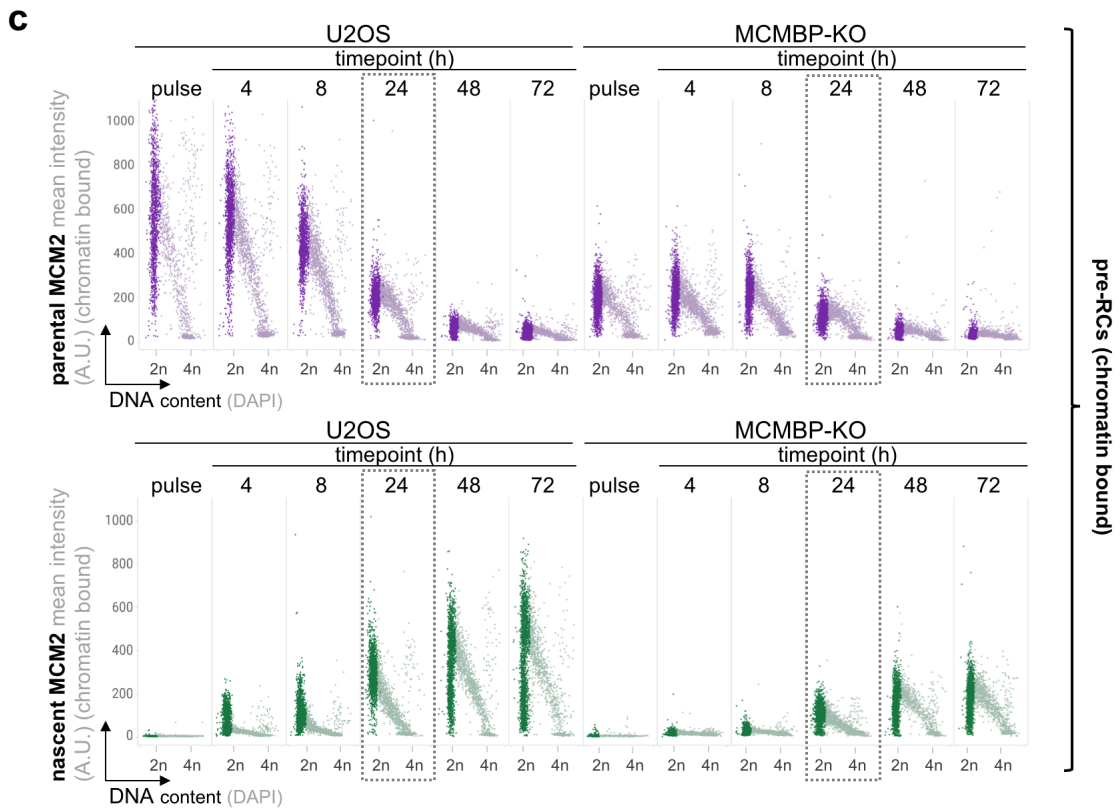



**Extended Data Fig. 8 | Analysis of the total nuclear and chromatin-bound pool of nascent and parental MCM2 in normal and MCMBP deficient cells.** **a**, Dual-HaloTag labeling protocol in U2OS (MCM2-Halo) and MCMBP-KO (MCM2-Halo) cells. **b**, Top, QIBC of U2OS (MCM2-Halo) and MCMBP-KO (MCM2-Halo) immunostained for parental MCM2 (purple) without pre-extraction before fixation for indicated timepoints. Bottom, QIBC of U2OS (MCM2-Halo) and MCMBP-KO (MCM2-Halo) immunostained for nascent MCM2 (green) without pre-extraction before fixation for indicated timepoints. Immunostaining of parental and nascent MCM2 was performed according labeling protocol in a. Boxes mark the cell doubling time and data presented in Fig.3a, b.  $n \approx 3000$  cells per condition. **c**, Top, QIBC of U2OS (MCM2-Halo) and MCMBP-KO (MCM2-Halo) immunostained for parental MCM2 (purple) with pre-extraction before fixation for indicated timepoints. Bottom, QIBC of U2OS (MCM2-Halo) and MCMBP-KO (MCM2-Halo) immunostained for nascent MCM2 (green) with pre-extraction before fixation for indicated timepoints. immunostaining of parental and nascent MCM2 was performed according labeling protocol in a. Box marks the cell doubling time and data presented in Fig.3d, e.  $n \approx 2400$  cells per condition.



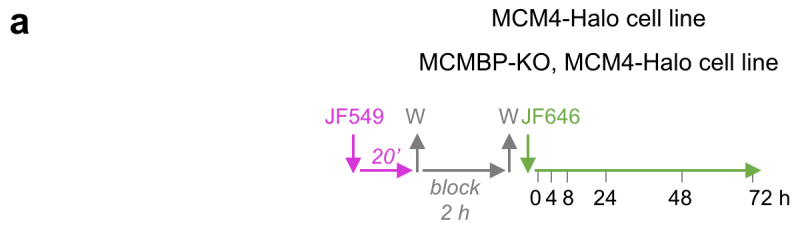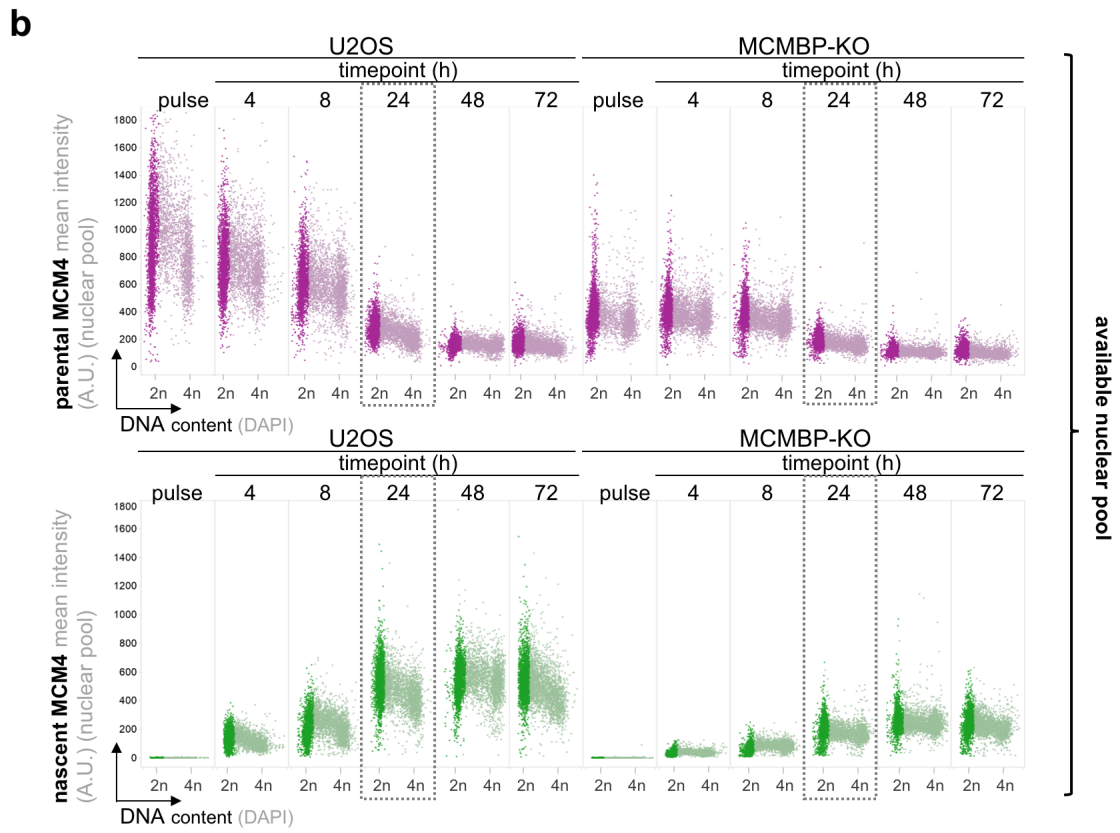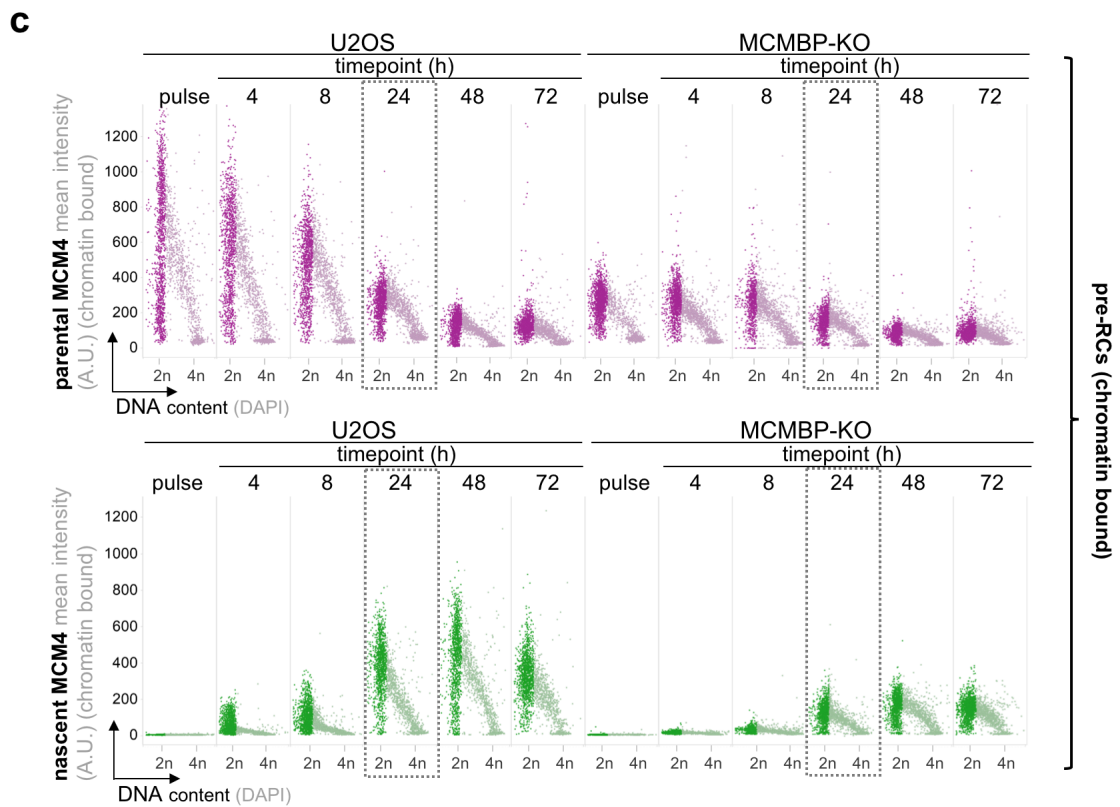

**Extended Data Fig. 9 | Analysis of the total nuclear and chromatin-bound pool of nascent and parental MCM4 in normal and MCMBP deficient cells.** **a**, Dual-HaloTag labeling protocol in U2OS (MCM4-Halo) and MCMBP-KO (MCM4-Halo) cells. **b**, Top, QIBC of U2OS (MCM4-Halo) and MCMBP-KO (MCM4-Halo) immunostained for parental MCM4 (magenta) without pre-extraction before fixation for indicated timepoints. Bottom, QIBC of U2OS (MCM4-Halo) and MCMBP-KO (MCM4-Halo) immunostained for nascent (green) MCM4 without pre-extraction before fixation for indicated timepoints. Staining of parental and nascent MCM4 was performed according labeling protocol in a. Boxes mark the cell doubling time and data presented in Fig.3a, b. n  $\approx$ 4700 cells per condition. **c**, Top, QIBC of U2OS (MCM4-Halo) and MCMBP-KO (MCM4-Halo) immunostained for parental MCM4 (magenta) with pre-extraction before fixation for indicated timepoints. Bottom, QIBC of U2OS (MCM4-Halo) and MCMBP-KO (MCM4-Halo) immunostained for nascent MCM4 (green) with pre-extraction before fixation for indicated timepoints. Immunostaining of parental and nascent MCM4 was performed according labeling protocol in a. Box marks the cell doubling time and data presented in Fig.3d, e. n  $\approx$ 2200 cells per condition.

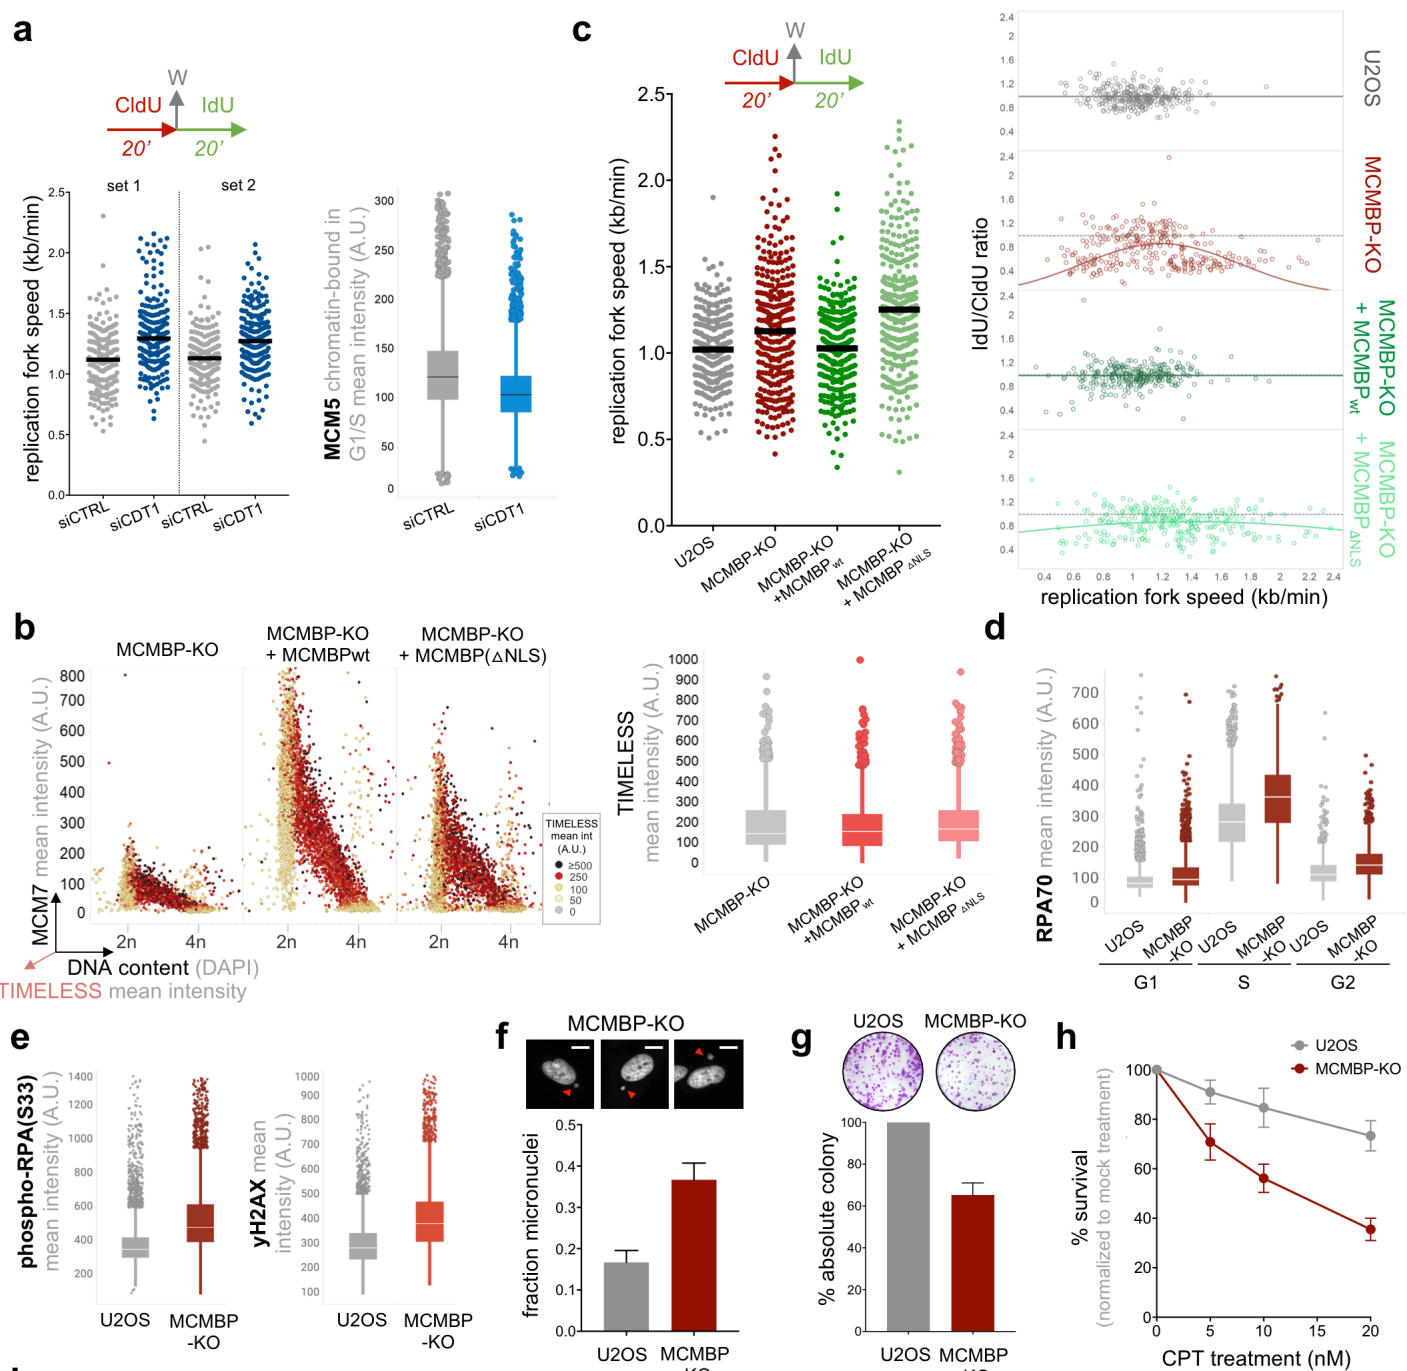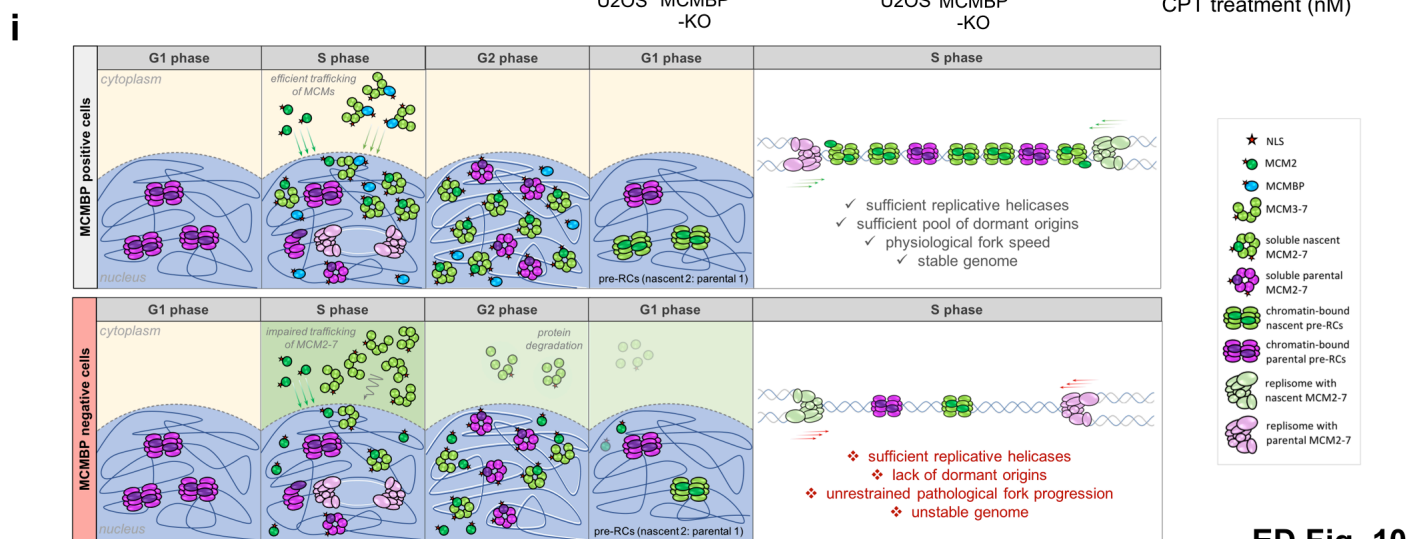

**Extended Data Fig. 10 | The lack of MCM surplus and paucity of pre-RC licensing in MCMBP deficient cells is associated with increased fork speed and replication stress.** **a**, Left (top), DNA fiber labeling protocol. Left (bottom), replication fork speed in cells treated with indicated siRNAs. The center lines in the plots are medians.  $n = 200$  fibers per condition. Right, MFI of chromatin-bound MCM5 in G1/S in cells treated with indicated siRNA. The center lines in the plots are medians.  $n \approx 3800$  cells per condition. **b**, Left, QIBC of chromatin-associated MCM7 in indicated cell lines. The color gradient represents the mean intensity of chromatin-bound TIMELESS.  $n \approx 4000$  cells per condition. Right, quantification of chromatin-bound TIMELESS. The center lines in the plots are medians. **c**, Left (top), DNA fiber labeling protocol. Left (bottom), replication fork speed in indicated cell lines. The center lines in the plots are medians.  $n = 300$  fibers per condition. Right, individual fork ratio derived from the data in (left) by dividing the length of DNA tracts labeled by IdU and CldU, respectively. The lines represent Gaussian fitting. **d**, QIBC of ssDNA-bound RPA during cell cycle phases in indicated cell lines. The center lines in the plots are medians.  $n \approx 5700$  cells per condition. **e**, Left, QIBC of phospho-RPA (S33) in indicated cell lines. Right, QIBC of  $\gamma$ H2AX in indicated cell lines. The center line in the plots are medians.  $n \approx 8000$  cells per condition. **f**, Frequency of micronuclei formation (500 nuclei per condition) derived from the indicated exponentially growing cell lines and represented as percentage of all counted nuclei per condition. Mean  $\pm$  SD (from 3 independent biological replicates). **g**, Relative plating efficiency of MCMBP-KO cells compared to naïve U2OS. Mean  $\pm$  SD,  $n = 3$ , technical replicates. **h**, Clonogenic survival of U2OS and MCMBP-KO cells, 10 days after continuous treatment with CPT with indicated concentrations (mean  $\pm$  SD,  $n = 3$ , technical replicates) **i**, A hypothetical model depicting the efficient production, nuclear transport and stable inheritance of MCM2-7, and the role of MCMBP in this process, to ensure optimal levels of origin licensing and replication fork progression in successive cell generations (see text for details).
